# Supplementary material
Source: PubMed Central journal article supplement (PMC9309012)
Supplement: NIHMS1818375-supplement-1.pdf [file NIHMS1818375-supplement-1.pdf]

## **Supporting Information**

### **Gold(I) phosphine derivatives with improved selectivity as topically active drug leads to overcome 5-nitroheterocyclic drug resistance in *Trichomonas vaginalis***

Yukiko Miyamoto, Shubhangi Aggarwal, Jeff Joseph A. Celaje, Sozaburo Ihara,  
Jonathan Ang, Dmitry B. Eremin, Kirkwood M. Land, Lisa A. Wrischnik,  
Liangfang Zhang, Valery V. Fokin, and Lars Eckmann\*

Table of contents

1. NMR spectra of synthesized compounds
2. Purity assessment by quantitative  $^1\text{H}$  NMR
3. Molecular formula strings with bioactivity data

# (1-Thio- $\beta$ -D-glucopyranosato)(triethylphosphine) gold(I) (1)

$^1\text{H}$  NMR ( $\text{CDCl}_3$ , 600 MHz)

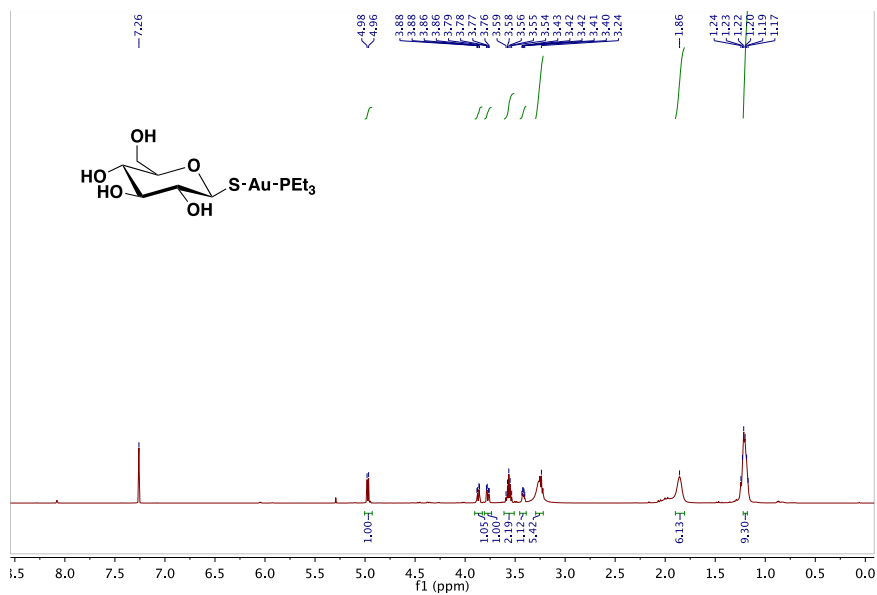

$^{13}\text{C}\{^1\text{H}\}$  NMR ( $\text{CDCl}_3$ , 151 MHz)

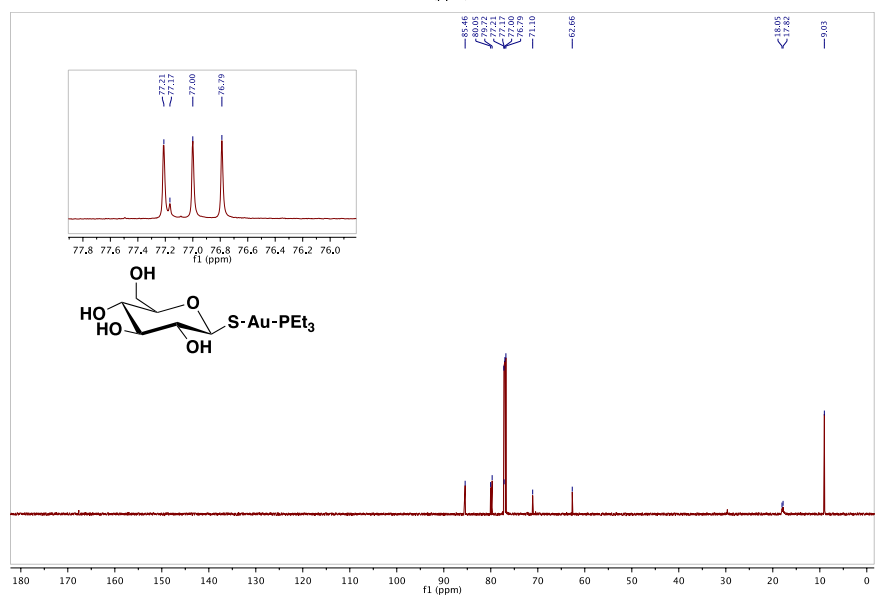

$^{31}\text{P}\{^1\text{H}\}$  NMR ( $\text{CDCl}_3$ , 243 MHz)

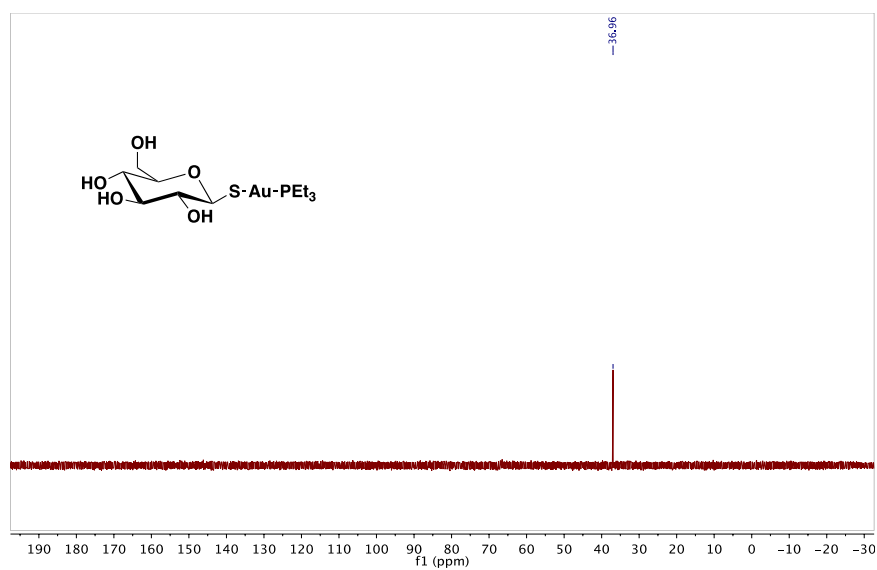

## S-Triethylphosphine gold(I) thiomalic acid (2)

$^1\text{H}$  NMR ( $\text{CDCl}_3$ , 600 MHz)

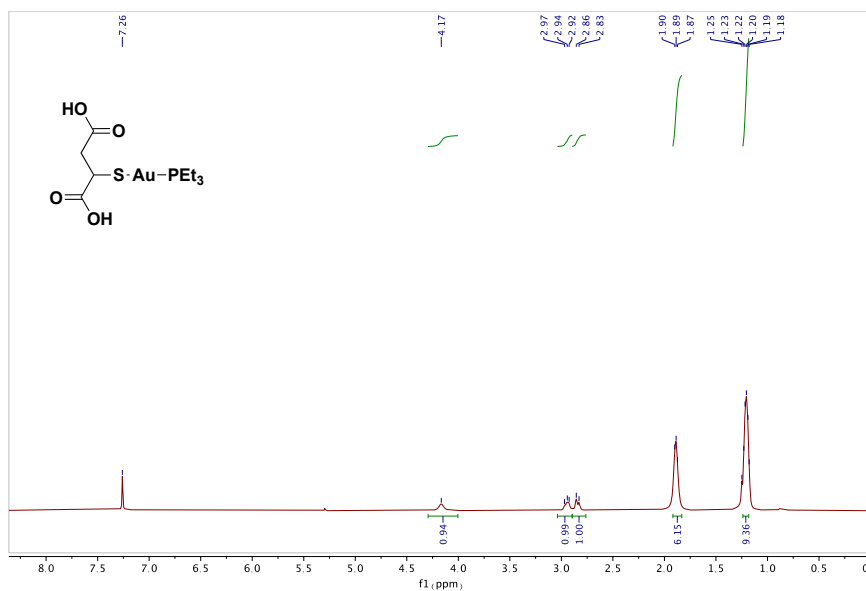

$^{13}\text{C}\{^1\text{H}\}$  NMR ( $\text{CDCl}_3$ , 151 MHz)

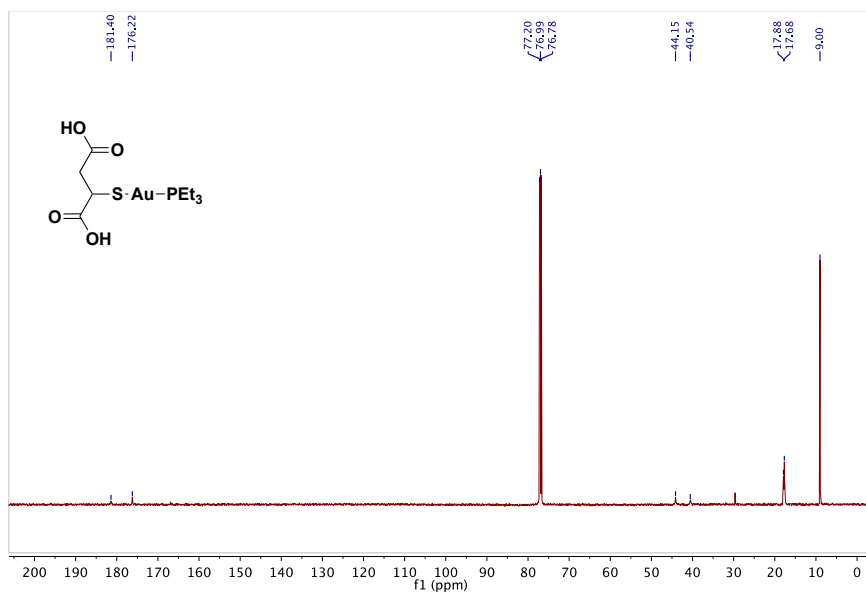

$^{31}\text{P}\{^1\text{H}\}$  NMR ( $\text{CDCl}_3$ , 243 MHz)

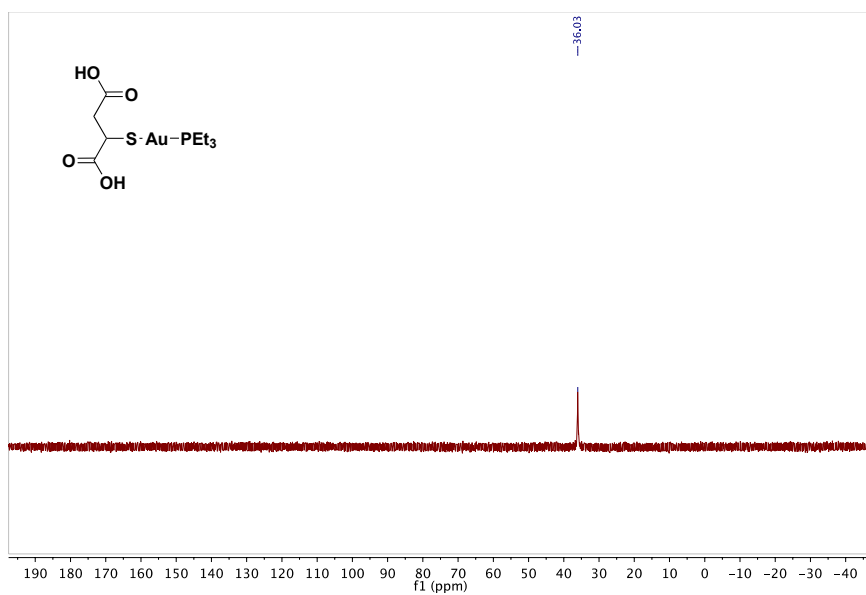

# [Triethylphosphine-(bis(2,4,6-trimethylphenyl)imidazol-2-ylidene)]gold(I) chloride (3)

$^1\text{H}$  NMR ( $\text{CDCl}_3$ , 600 MHz)

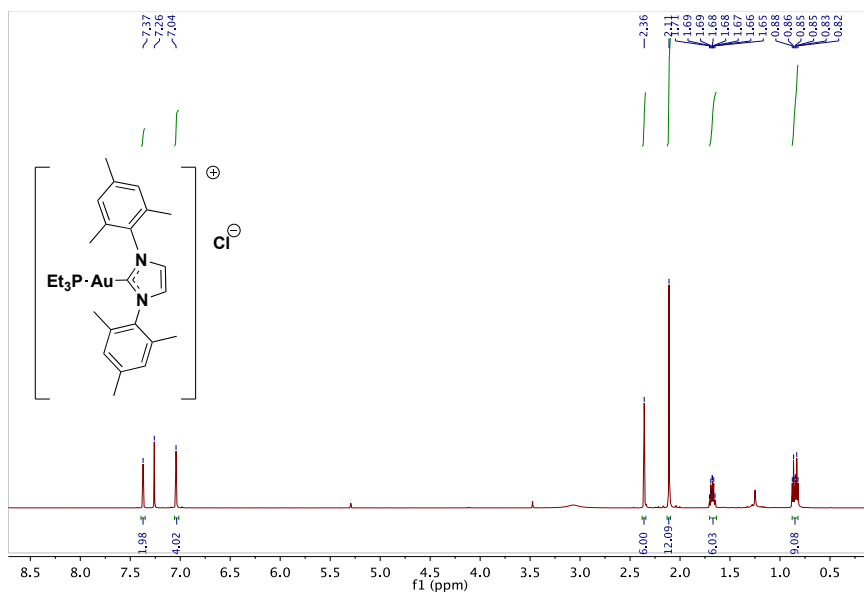

$^{13}\text{C}\{^1\text{H}\}$  NMR ( $\text{CDCl}_3$ , 151 MHz)

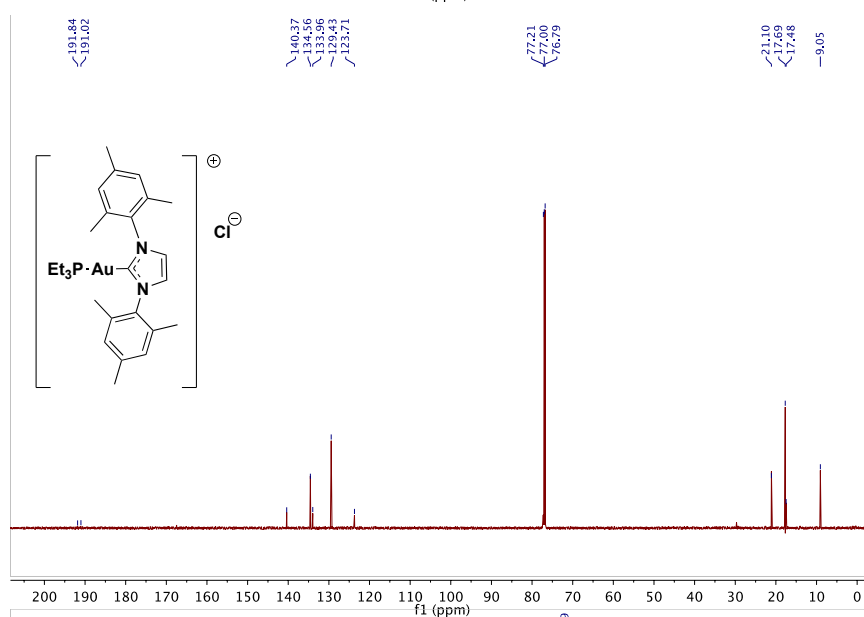

$^{31}\text{P}\{^1\text{H}\}$  NMR ( $\text{CDCl}_3$ , 243 MHz)

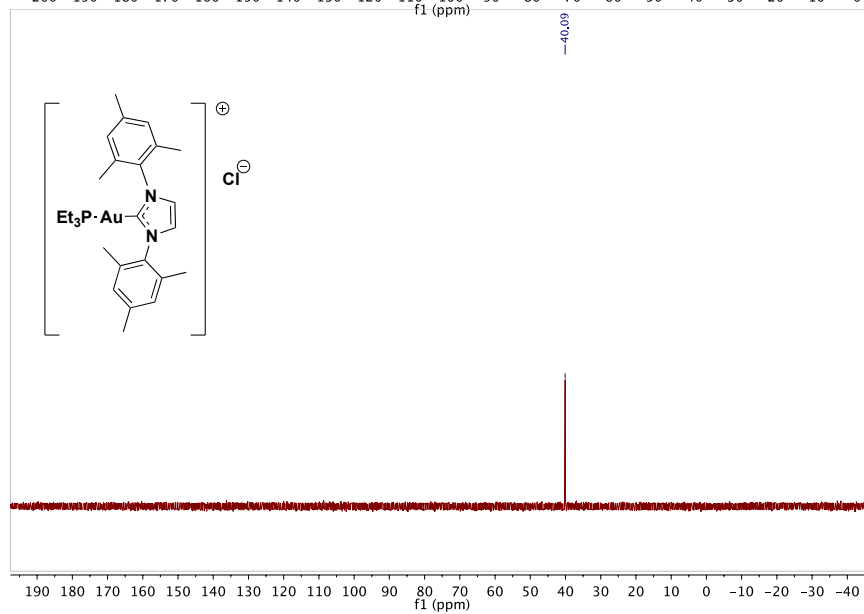

# 2,3,4,6-Tetra-O-acetyl-1-thio- $\beta$ -D-galactopyranosato)(butylphosphine) gold(I) (5)

$^1\text{H}$  NMR ( $\text{CDCl}_3$ , 500 MHz)

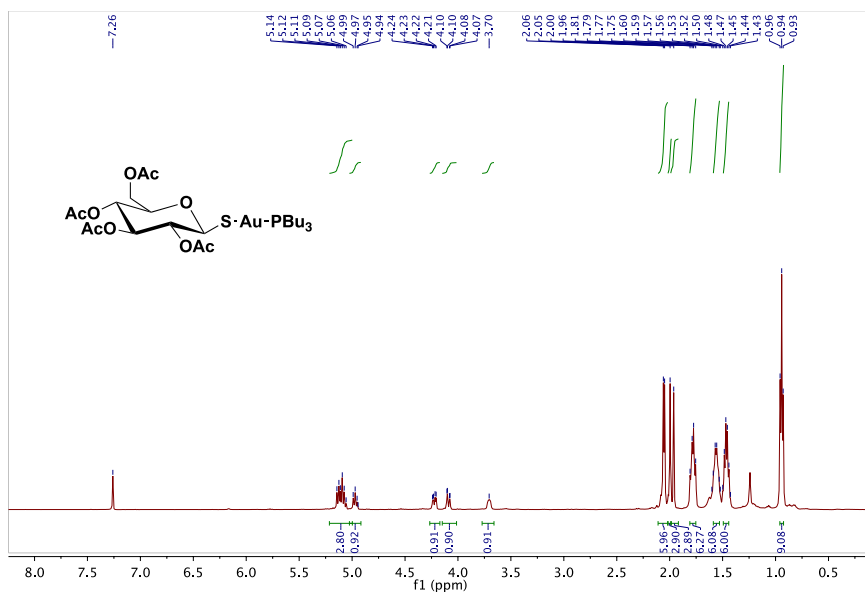

$^{13}\text{C}\{^1\text{H}\}$  NMR ( $\text{CDCl}_3$ , 126 MHz)

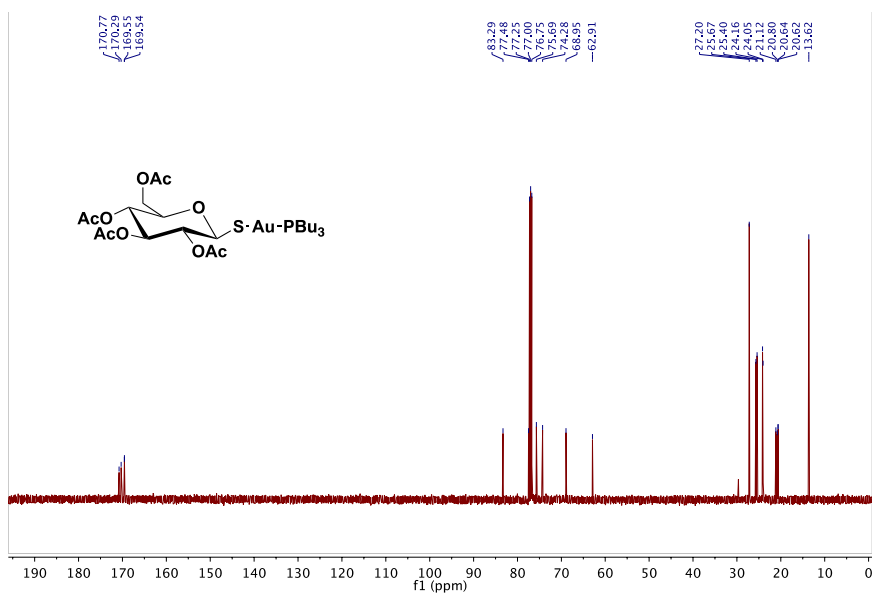

$^{31}\text{P}\{^1\text{H}\}$  NMR ( $\text{CDCl}_3$ , 202 MHz)

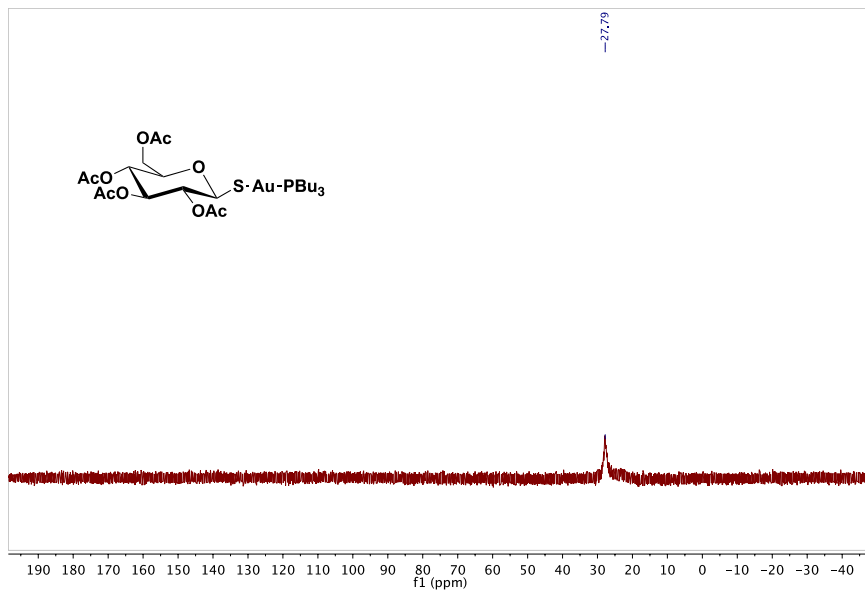

# (1-Thio- $\beta$ -D-glucopyranosato)(tributylphosphine) gold(I) (6)

$^1\text{H}$  NMR ( $\text{CDCl}_3$ , 500 MHz)

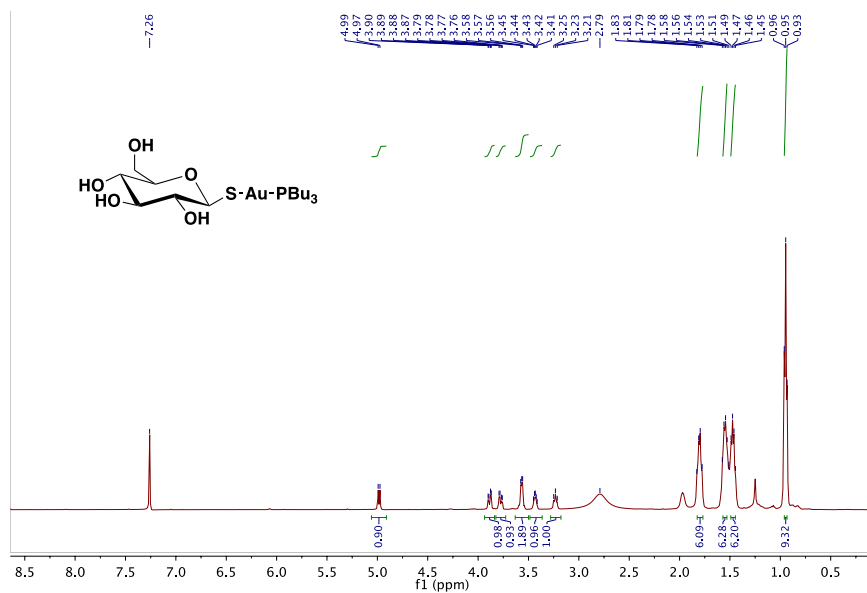

$^{13}\text{C}\{^1\text{H}\}$  NMR ( $\text{CDCl}_3$ , 126 MHz)

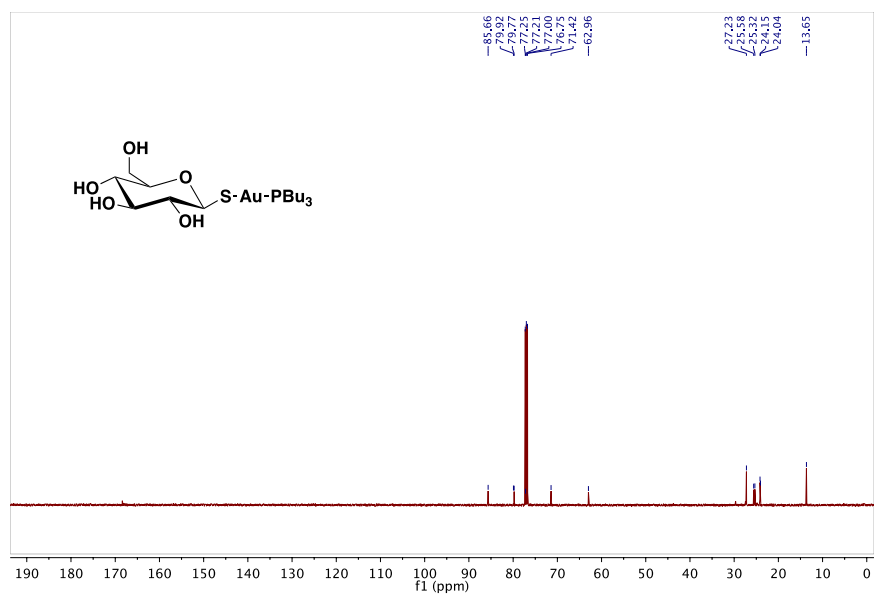

$^{31}\text{P}\{^1\text{H}\}$  NMR ( $\text{CDCl}_3$ , 202 MHz)

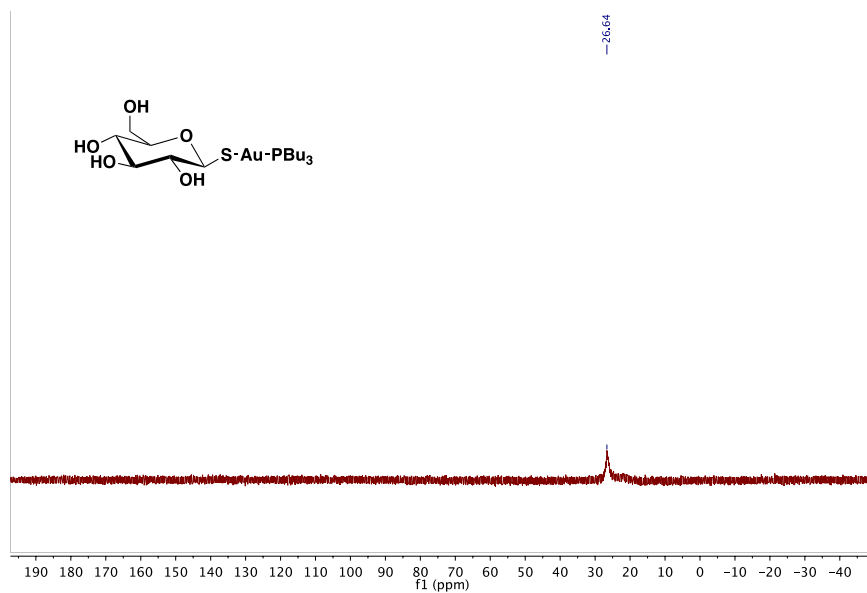

## S-Tributylphosphine gold(I) thiomalic acid (7)

$^1\text{H}$  NMR ( $\text{CDCl}_3$ , 600 MHz)

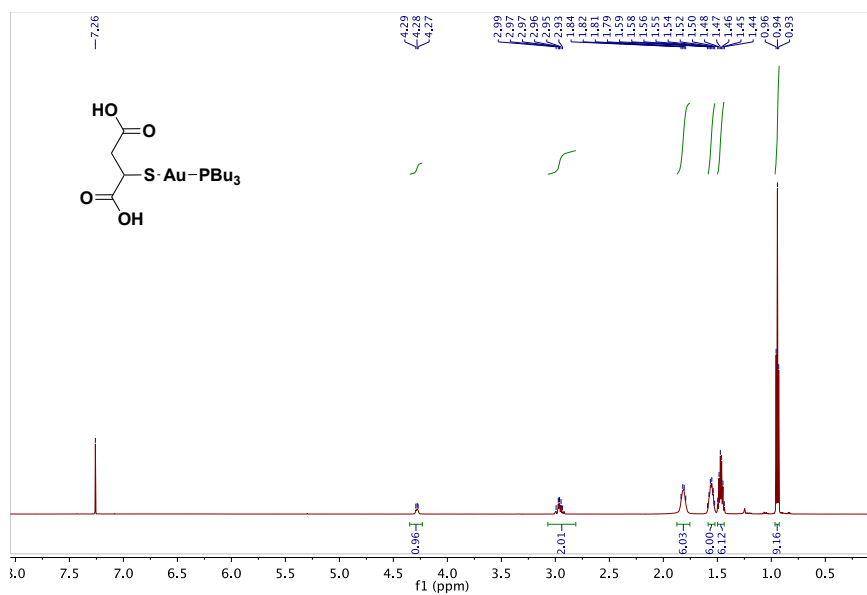

$^{13}\text{C}\{^1\text{H}\}$  NMR ( $\text{CDCl}_3$ , 126 MHz)

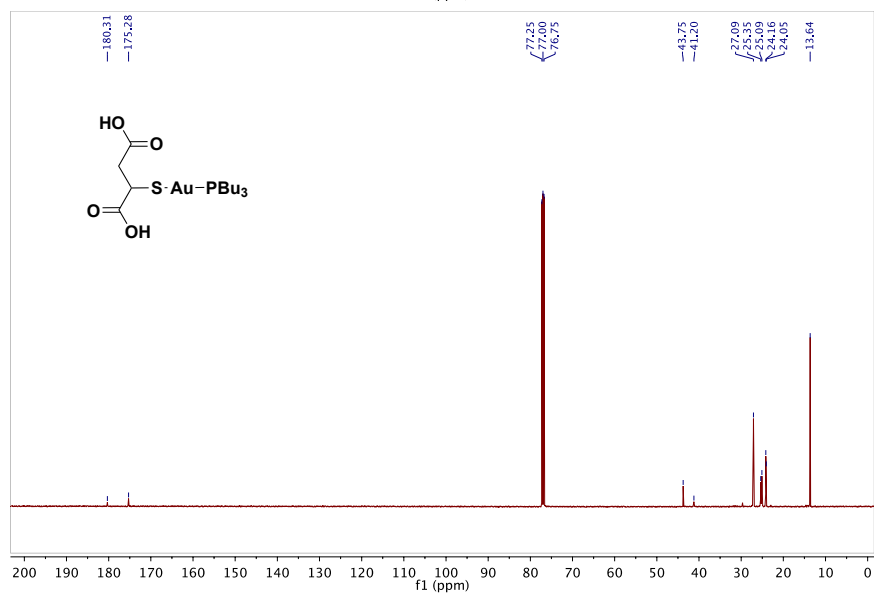

$^{31}\text{P}\{^1\text{H}\}$  NMR ( $\text{CDCl}_3$ , 202 MHz)

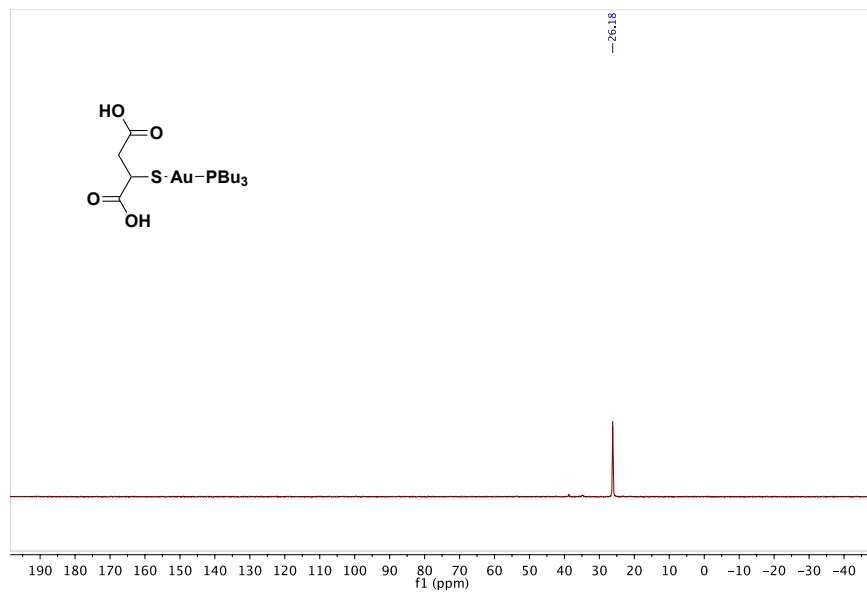

# [Tributylphosphine-(bis(2,4,6-trimethylphenyl)imidazol-2-ylidene)]gold(I) chloride (8)

$^1\text{H}$  NMR ( $\text{CDCl}_3$ , 600 MHz)

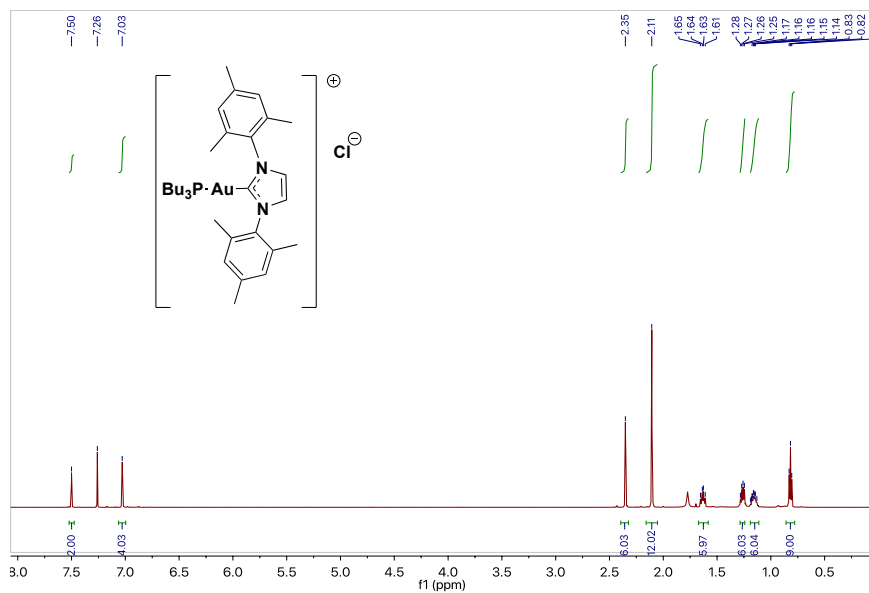

$^{13}\text{C}\{^1\text{H}\}$  NMR ( $\text{CDCl}_3$ , 151 MHz)

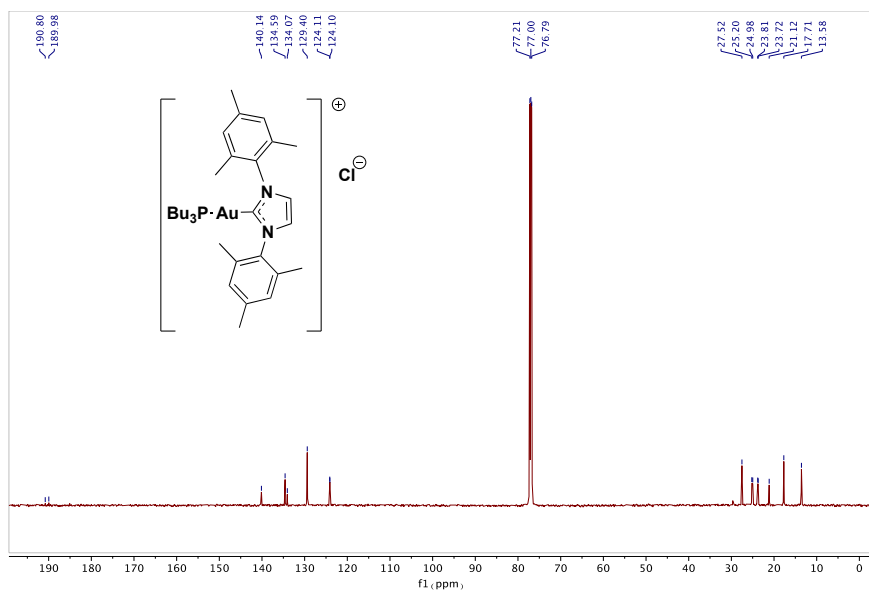

$^{31}\text{P}\{^1\text{H}\}$  NMR ( $\text{CDCl}_3$ , 243 MHz)

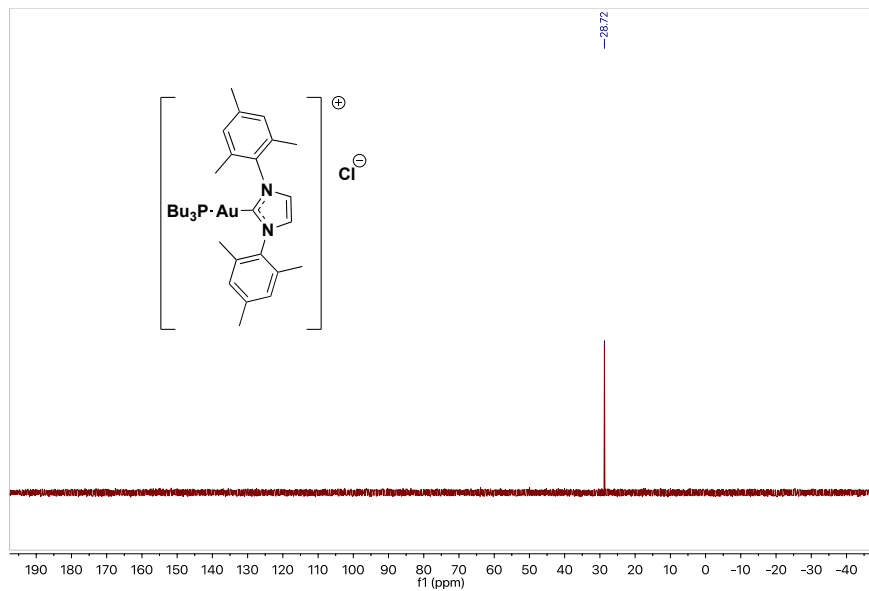



# (Tri-*n*-butylphosphine)gold(I) chloride (9)

$^1\text{H}$  NMR ( $\text{CDCl}_3$ , 500 MHz)

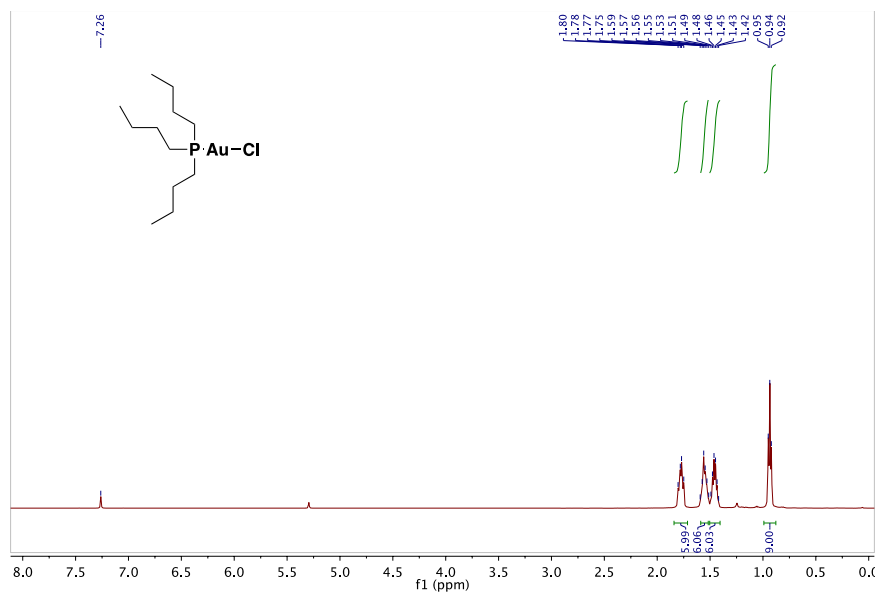

$^{13}\text{C}\{^1\text{H}\}$  NMR ( $\text{CDCl}_3$ , 126 MHz)

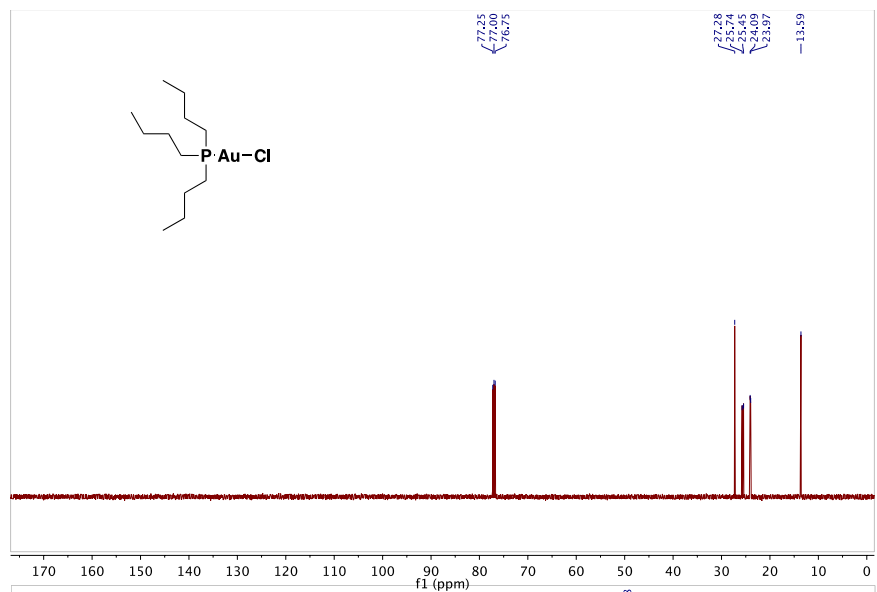

$^{31}\text{P}\{^1\text{H}\}$  NMR ( $\text{CDCl}_3$ , 202 MHz)

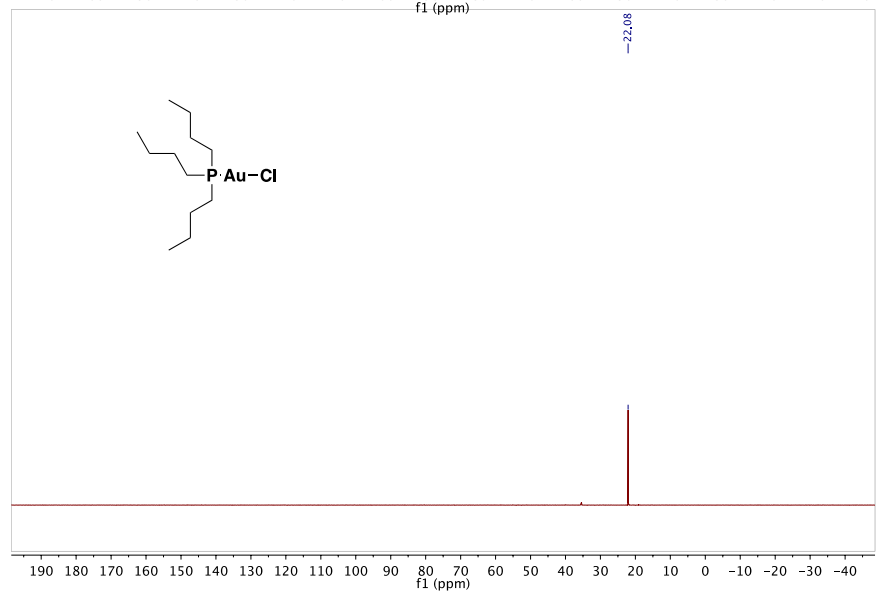

# (Tri-*n*-propylphosphine)gold(I) chloride (11)

$^1\text{H}$  NMR ( $\text{CDCl}_3$ , 400 MHz)

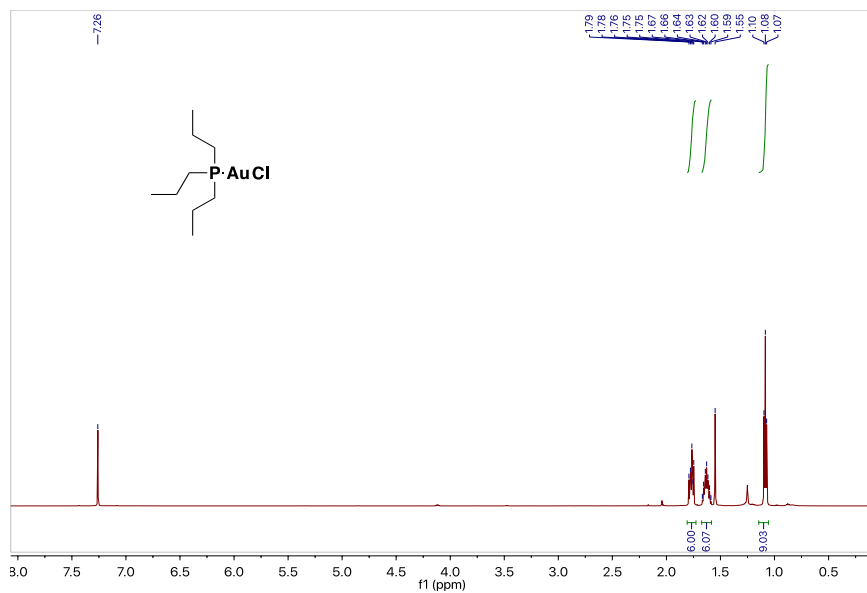

$^{13}\text{C}\{^1\text{H}\}$  NMR ( $\text{CDCl}_3$ , 101 MHz)

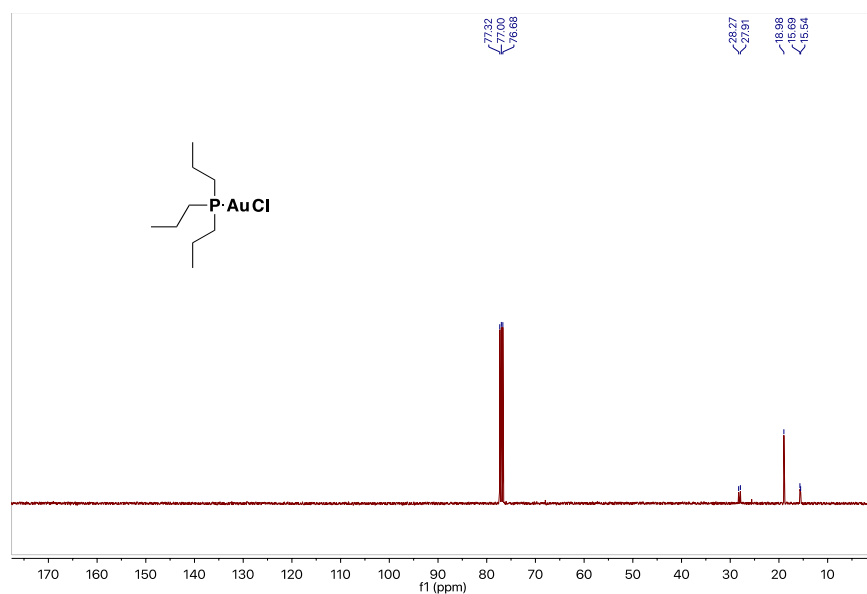

$^{31}\text{P}\{^1\text{H}\}$  NMR ( $\text{CDCl}_3$ , 202 MHz)

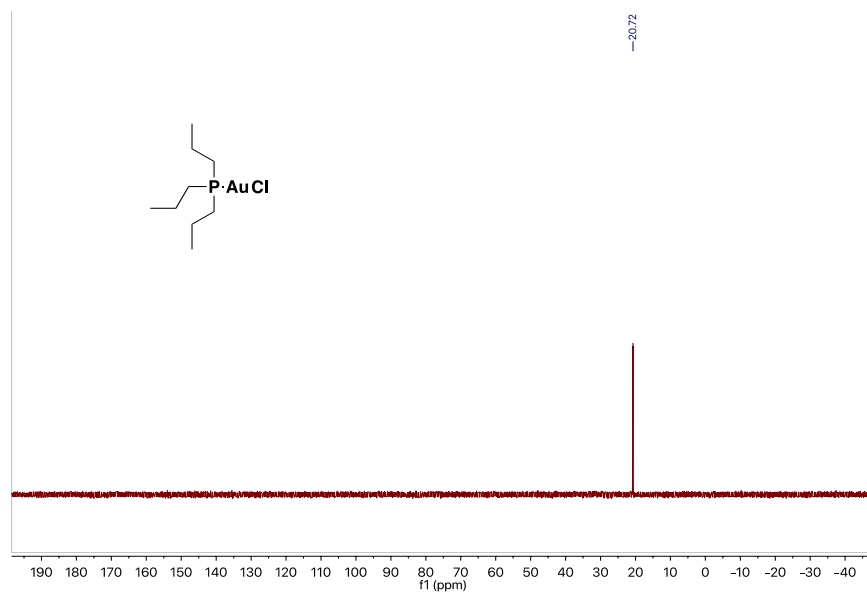

# (Triisopropylphosphine)gold(I) chloride (12)

$^1\text{H}$  NMR ( $\text{CDCl}_3$ , 600 MHz)

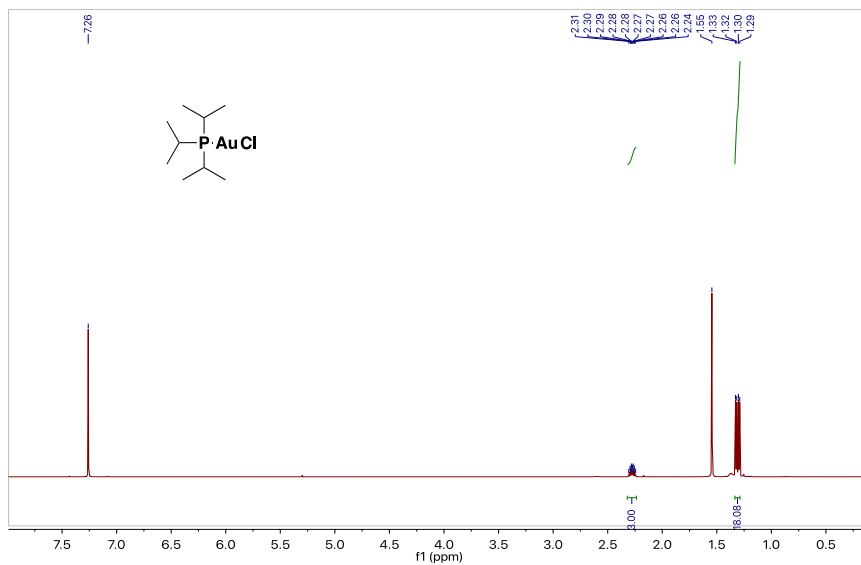

$^{13}\text{C}\{^1\text{H}\}$  NMR ( $\text{CDCl}_3$ , 101 MHz)

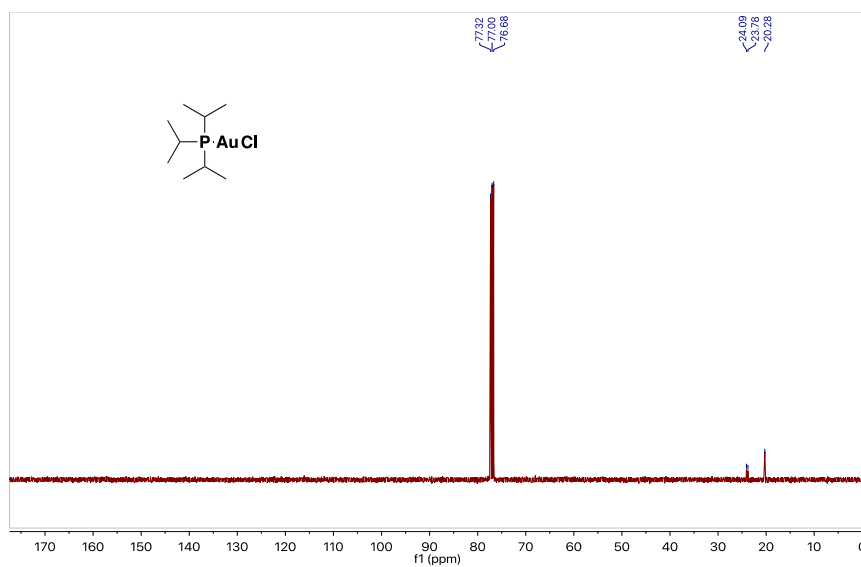

$^{31}\text{P}\{^1\text{H}\}$  NMR ( $\text{CDCl}_3$ , 162 MHz)

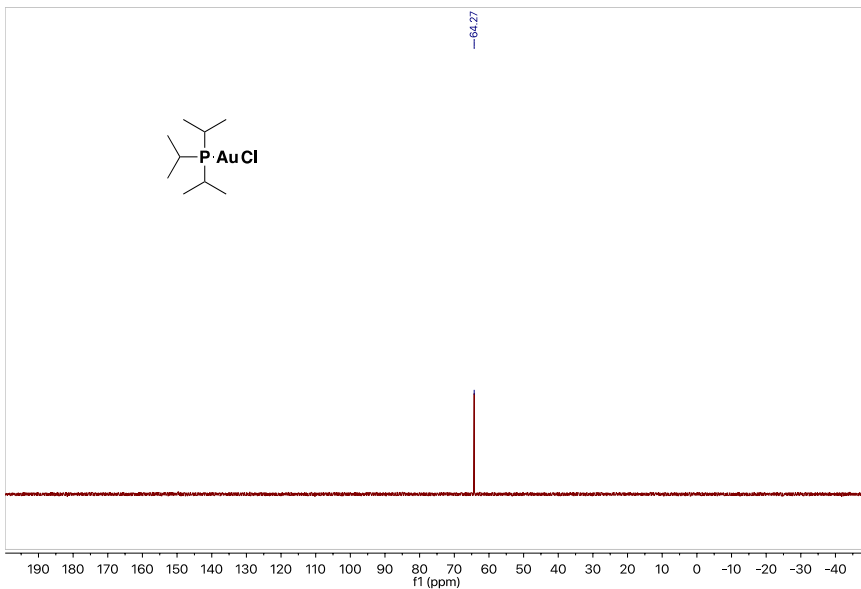

# (Trimethylphosphine)gold(I) chloride (13)

$^1\text{H}$  NMR ( $\text{CDCl}_3$ , 600 MHz)

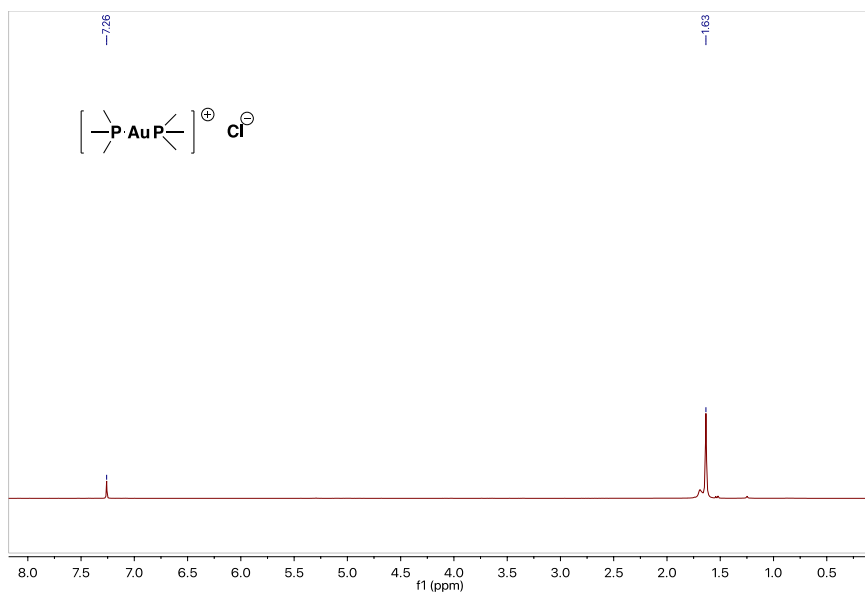

$^{13}\text{C}\{^1\text{H}\}$  NMR ( $\text{CDCl}_3$ , 151 MHz)

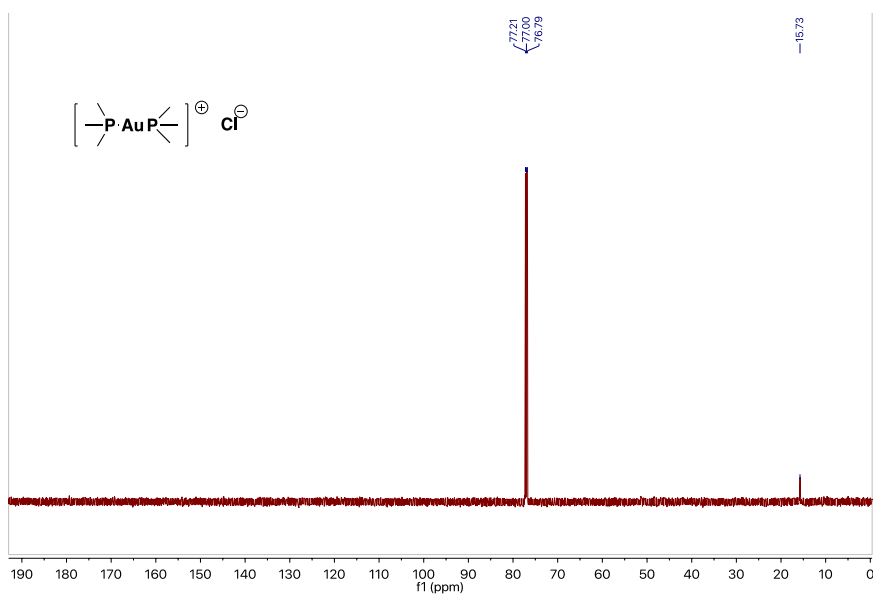

$^{31}\text{P}\{^1\text{H}\}$  NMR ( $\text{CDCl}_3$ , 243 MHz)

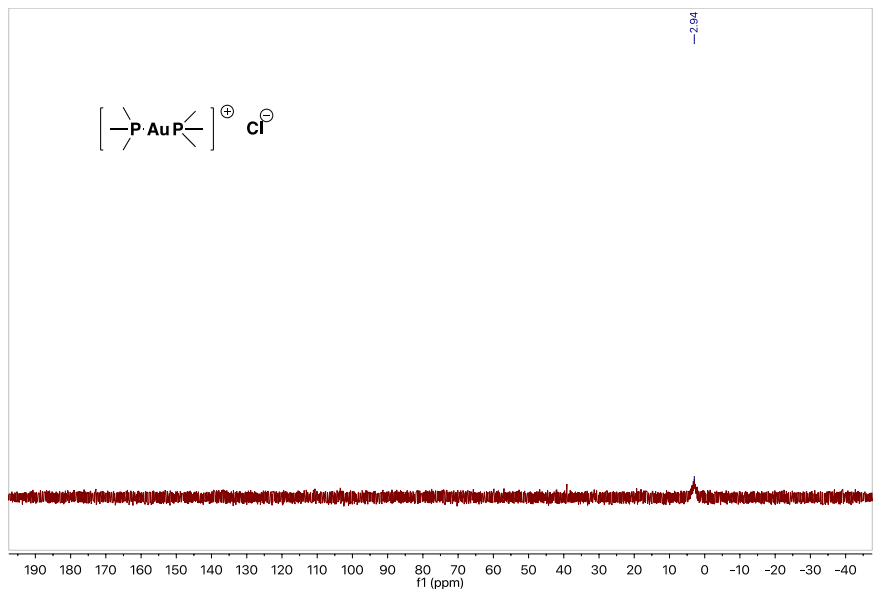

## Bis(triethylphosphine)gold(I) chloride (14)

$^1\text{H}$  NMR ( $\text{CDCl}_3$ , 400 MHz)

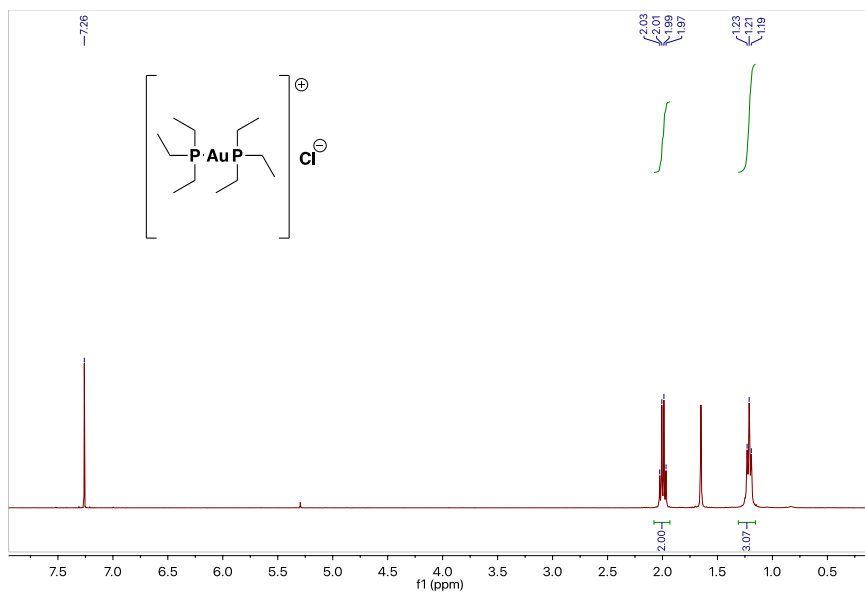

$^{13}\text{C}\{^1\text{H}\}$  NMR ( $\text{CDCl}_3$ , 101 MHz)

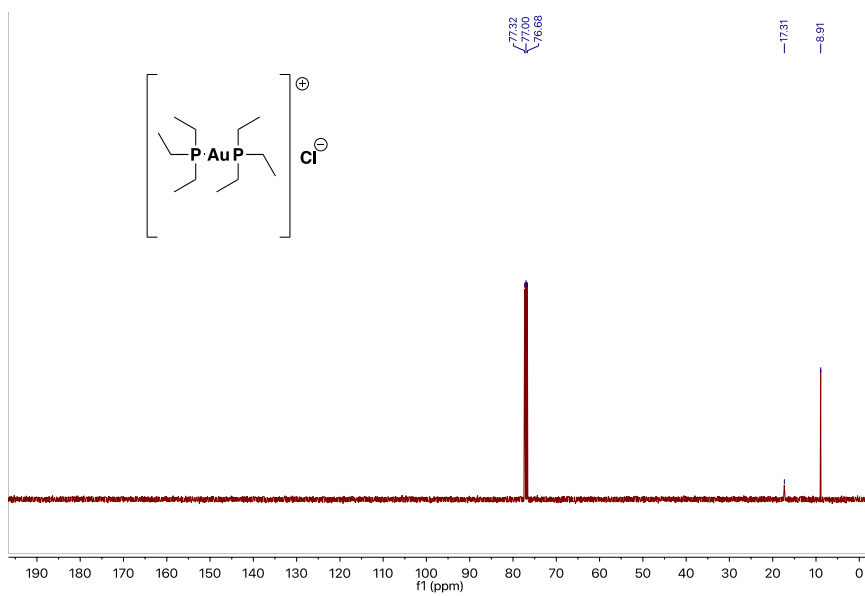

$^{31}\text{P}\{^1\text{H}\}$  NMR ( $\text{CDCl}_3$ , 162 MHz)

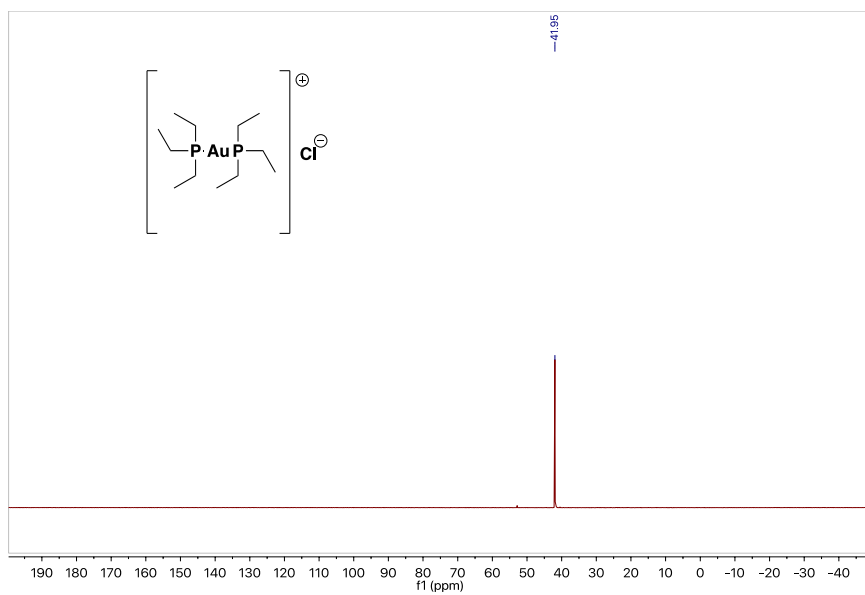

# Bis(tri-*n*-propylphosphine)gold(I) chloride (15)

$^1\text{H}$  NMR ( $\text{CDCl}_3$ , 600 MHz)

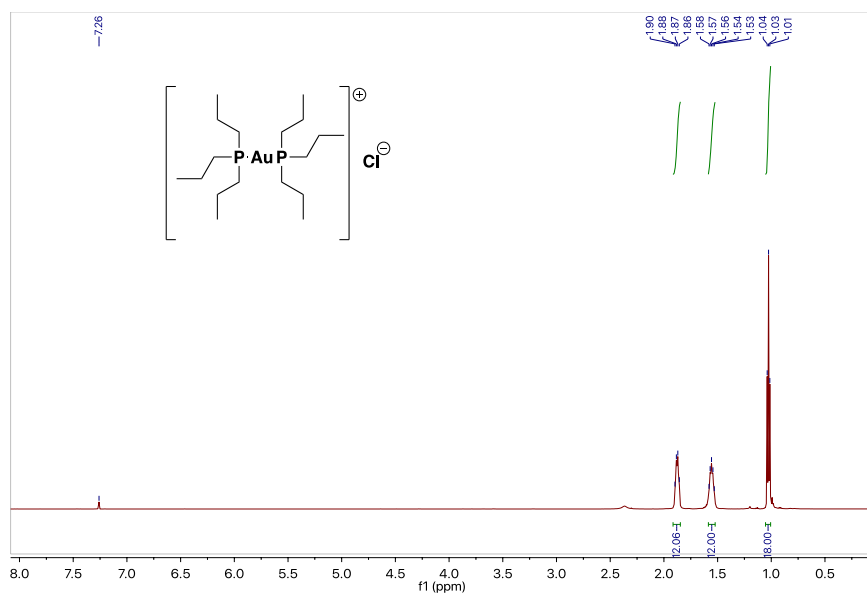

$^{13}\text{C}\{^1\text{H}\}$  NMR ( $\text{CDCl}_3$ , 101 MHz)

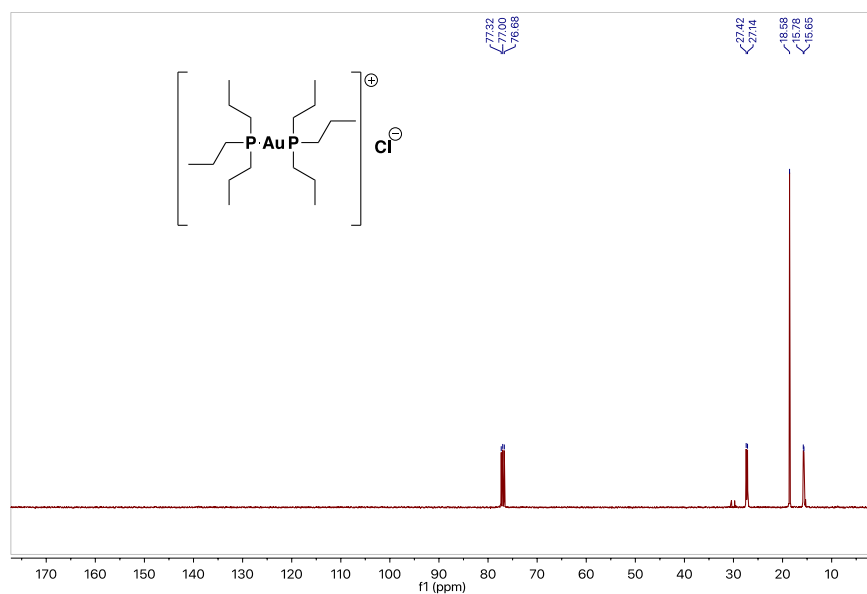

$^{31}\text{P}\{^1\text{H}\}$  NMR ( $\text{CDCl}_3$ , 243 MHz)

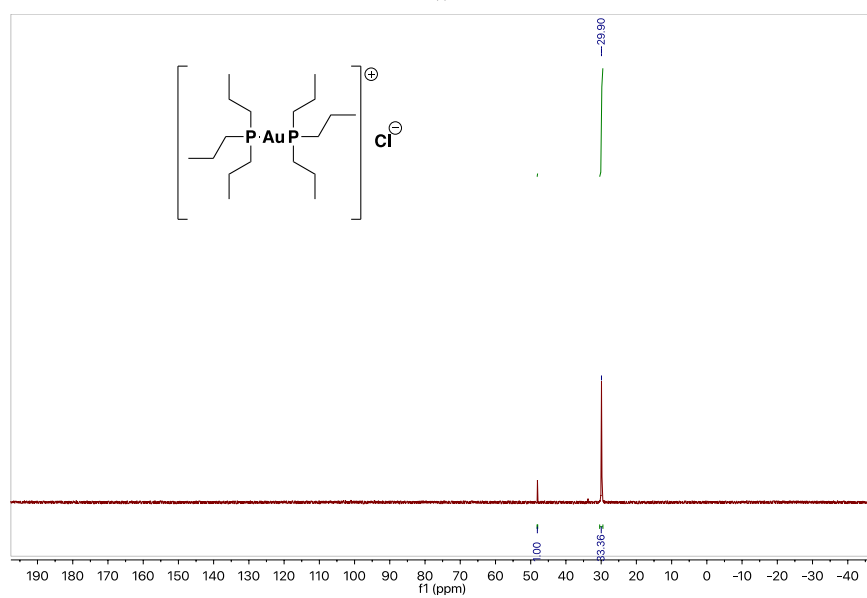

# Bis(triisopropylphosphine)gold(I) chloride (16)

$^1\text{H}$  NMR ( $\text{CDCl}_3$ , 600 MHz)

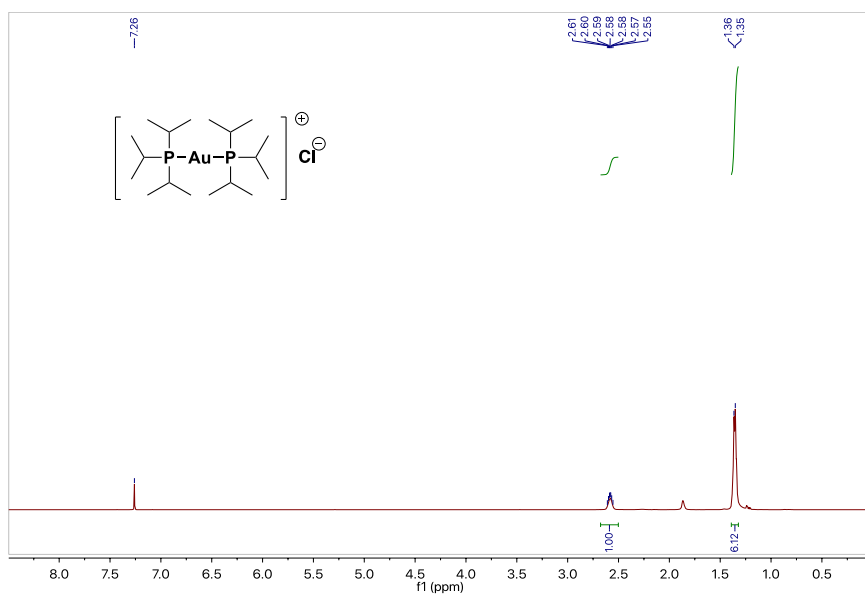

$^{13}\text{C}\{^1\text{H}\}$  NMR ( $\text{CDCl}_3$ , 151 MHz)

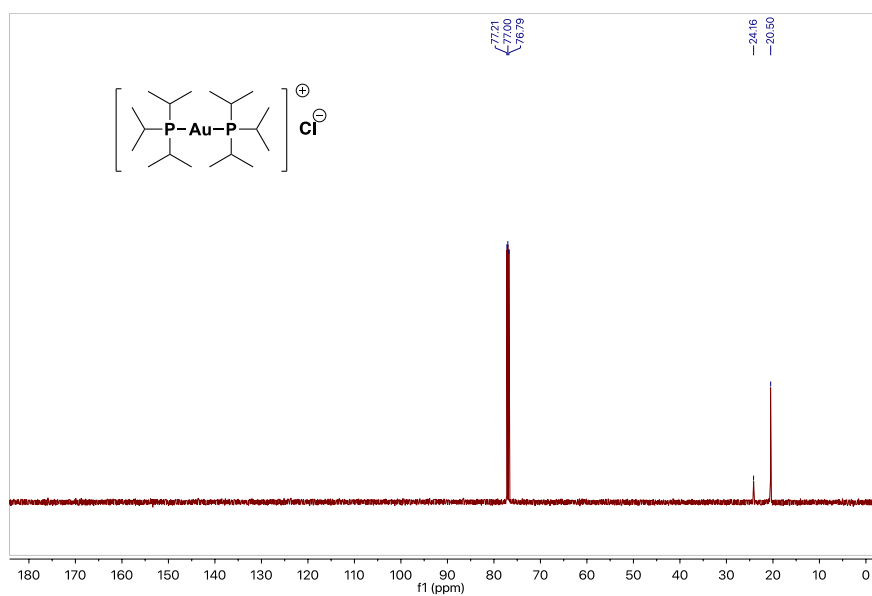

$^{31}\text{P}\{^1\text{H}\}$  NMR ( $\text{CDCl}_3$ , 243 MHz)

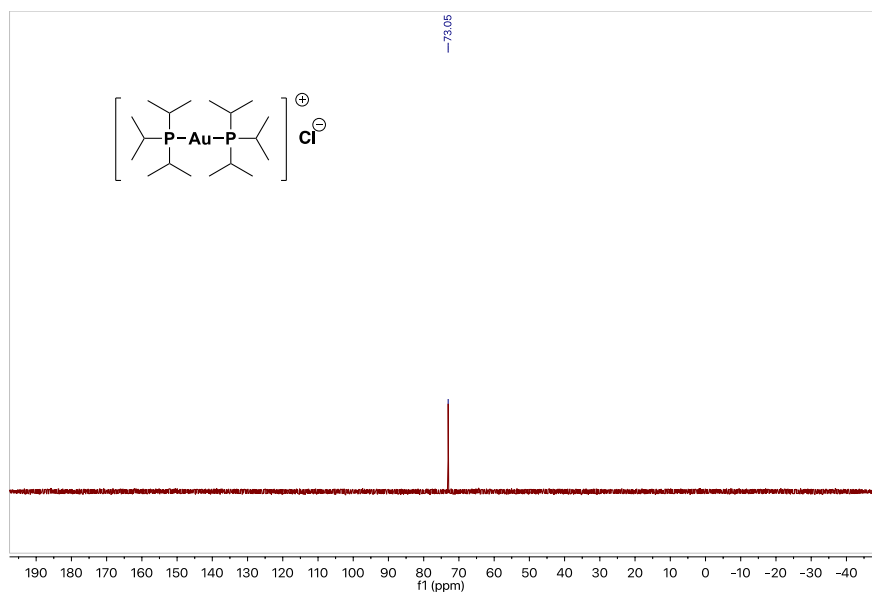

# (Dimethylphenylphosphine)gold(I) chloride (18)

$^1\text{H}$  NMR ( $\text{CDCl}_3$ , 600 MHz)

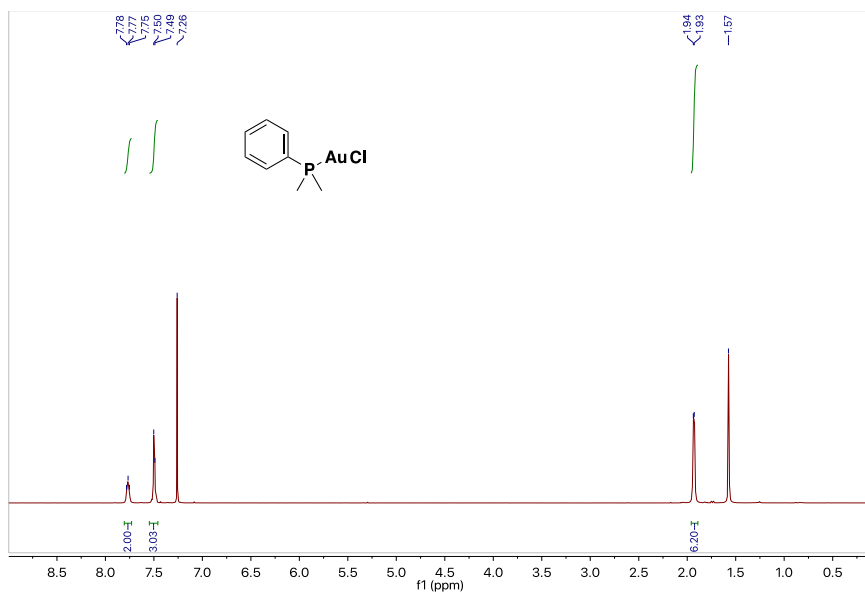

$^{13}\text{C}\{^1\text{H}\}$  NMR ( $\text{CDCl}_3$ , 101 MHz)

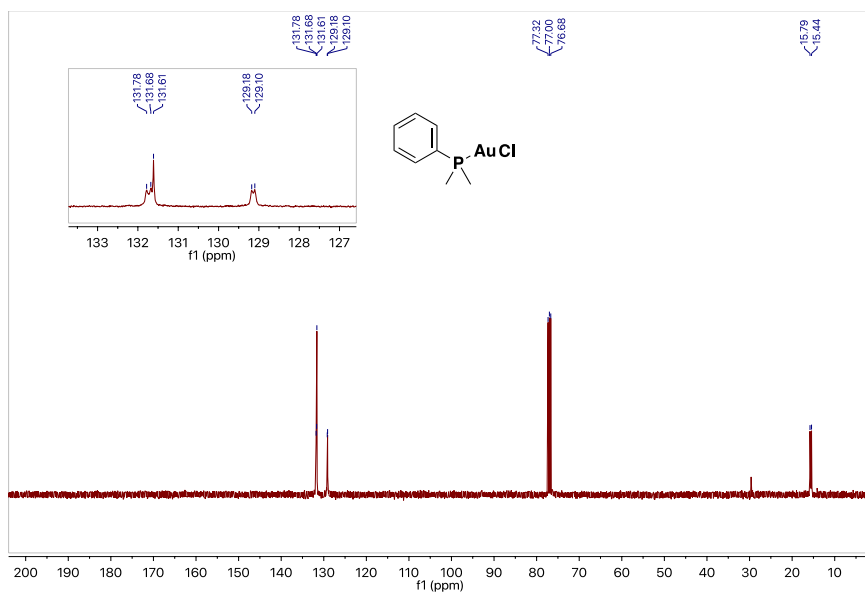

$^{31}\text{P}\{^1\text{H}\}$  NMR ( $\text{CDCl}_3$ , 243 MHz)

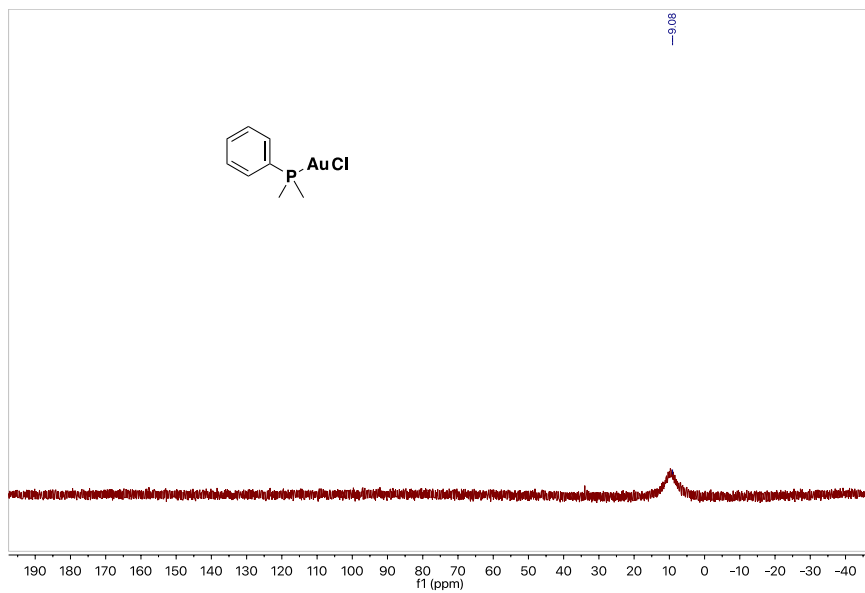



# (Trimethylphosphine)gold(I) bromide (23)

$^1\text{H}$  NMR ( $\text{CDCl}_3$ , 600 MHz)

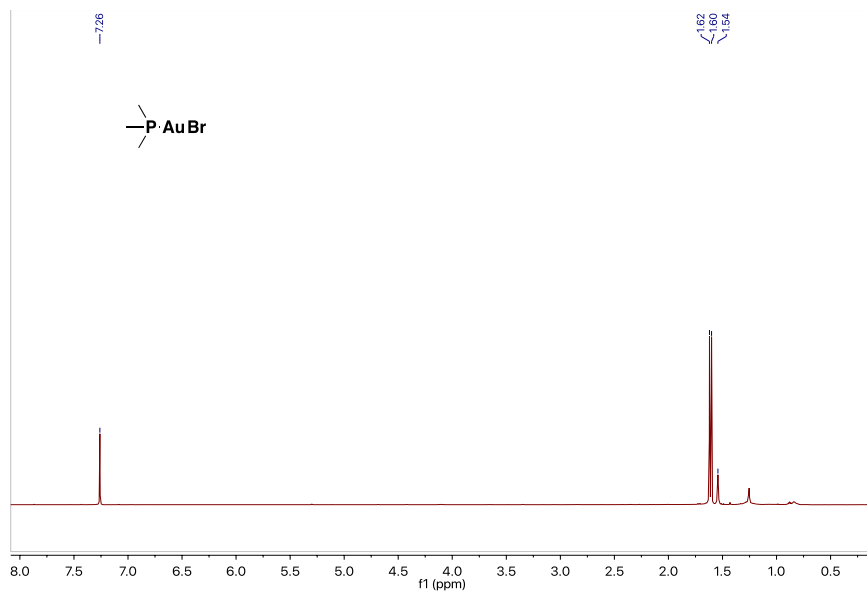

$^{13}\text{C}\{^1\text{H}\}$  NMR ( $\text{CDCl}_3$ , 101 MHz)

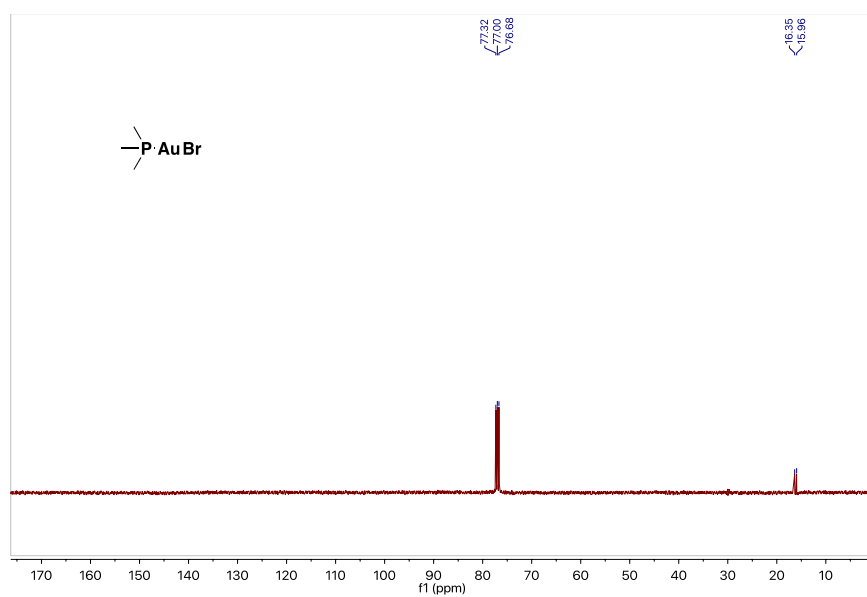

$^{31}\text{P}\{^1\text{H}\}$  NMR ( $\text{CDCl}_3$ , 243 MHz)

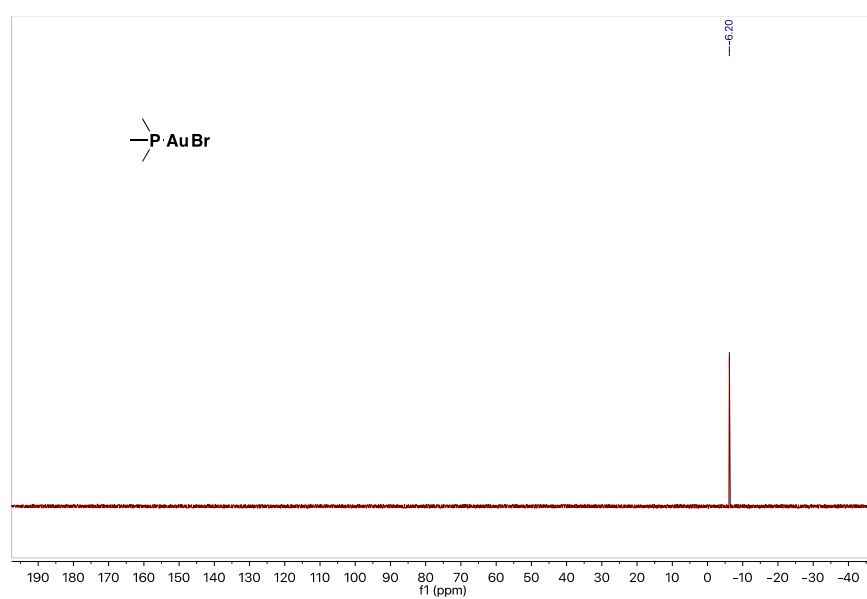

# (Triethylphosphine)gold(I) bromide (24)

$^1\text{H}$  NMR ( $\text{CDCl}_3$ , 600 MHz)

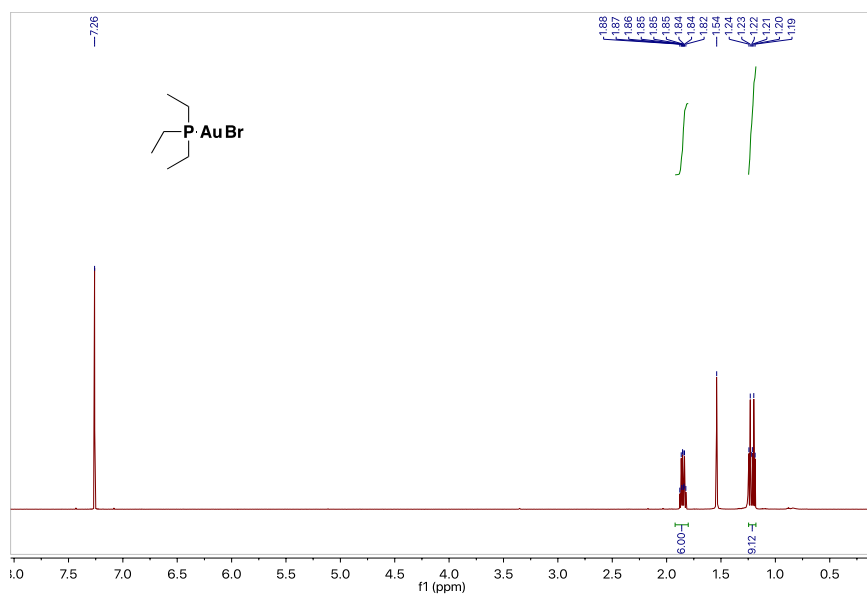

$^{13}\text{C}\{^1\text{H}\}$  NMR ( $\text{CDCl}_3$ , 101 MHz)

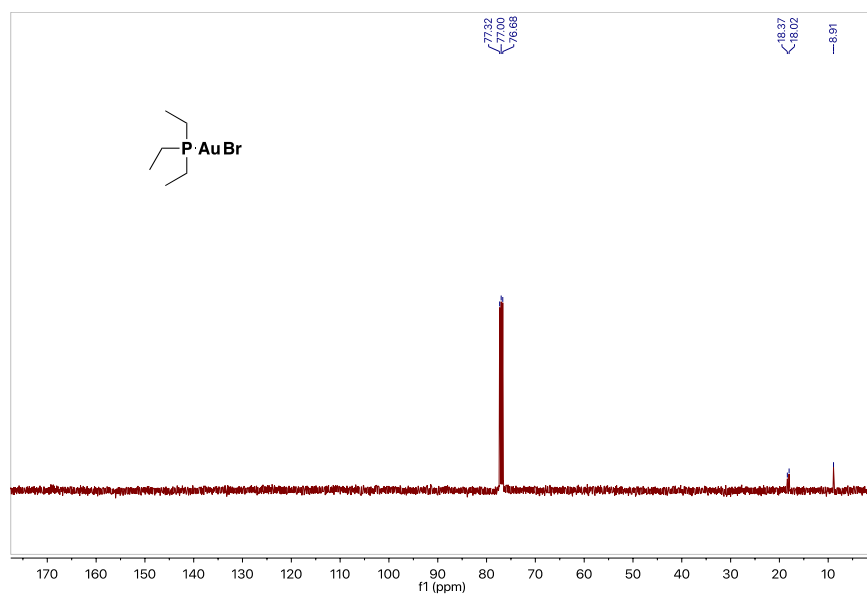

$^{31}\text{P}\{^1\text{H}\}$  NMR ( $\text{CDCl}_3$ , 243 MHz)

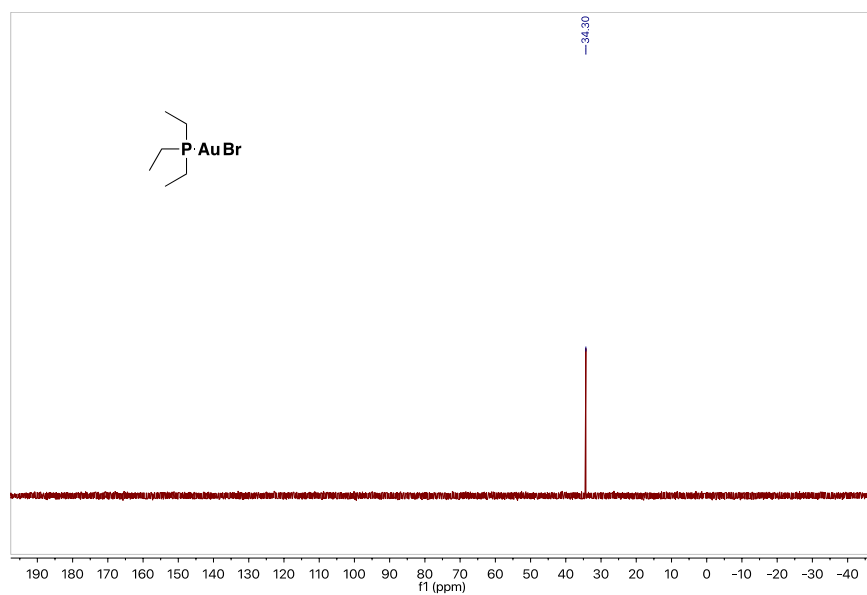

# (Trimethylphosphine)gold(I) iodide (25)

$^1\text{H}$  NMR ( $\text{CDCl}_3$ , 600 MHz)

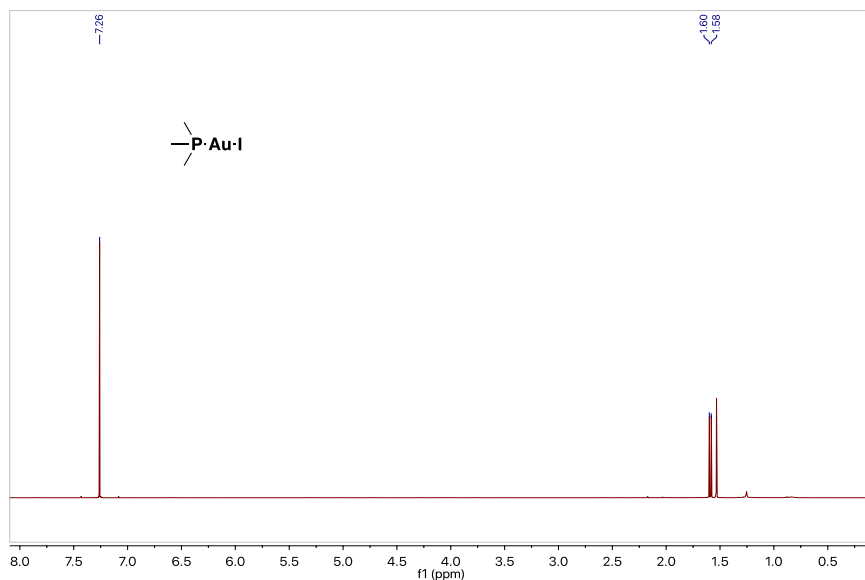

$^{13}\text{C}\{^1\text{H}\}$  NMR ( $\text{CDCl}_3$ , 101 MHz)

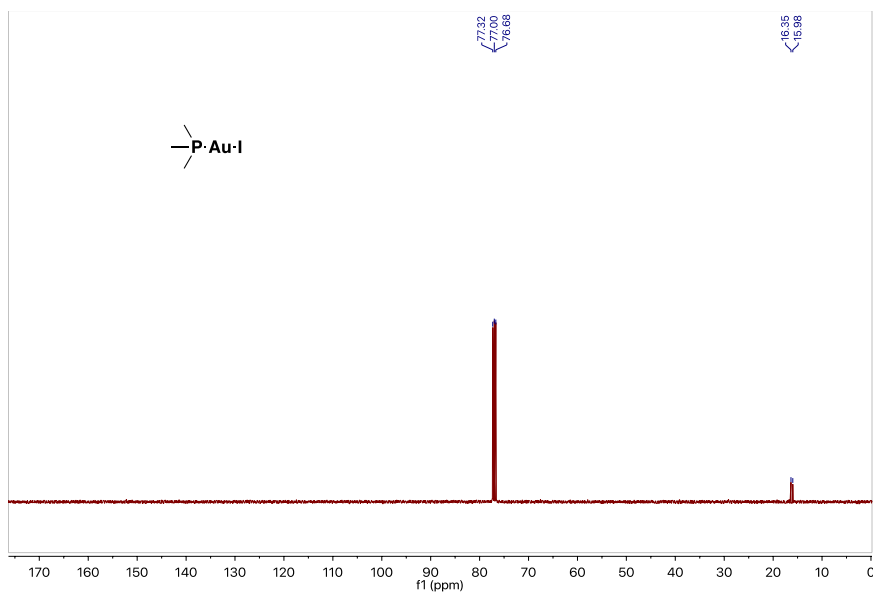

$^{31}\text{P}\{^1\text{H}\}$  NMR ( $\text{CDCl}_3$ , 243 MHz)

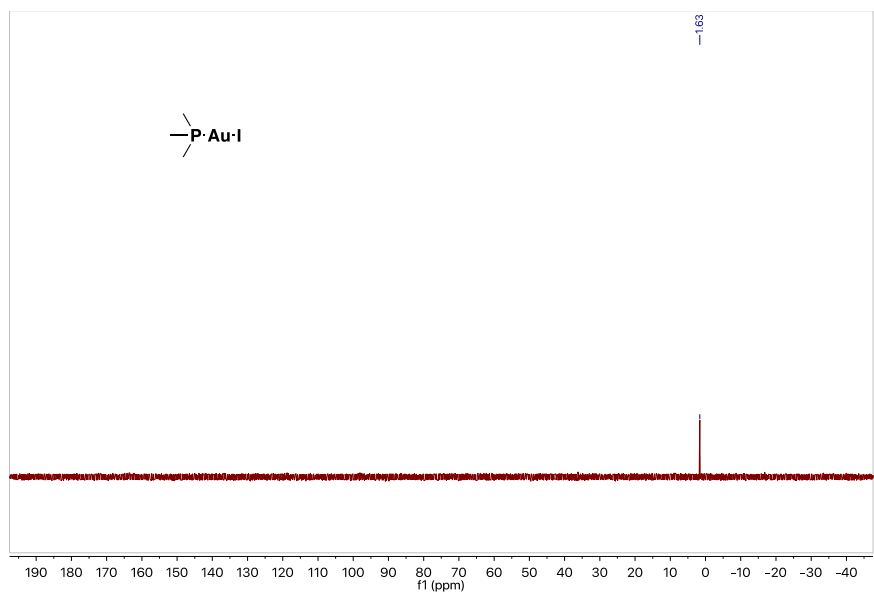

# (Triethylphosphine)gold(I) iodide (26)

$^1\text{H}$  NMR ( $\text{CDCl}_3$ , 600 MHz)

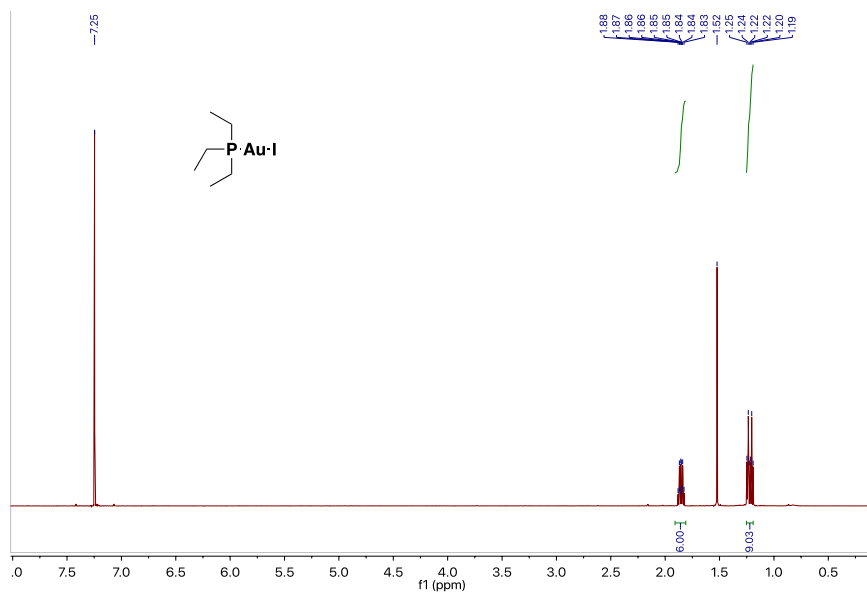

$^{13}\text{C}\{^1\text{H}\}$  NMR ( $\text{CDCl}_3$ , 101 MHz)

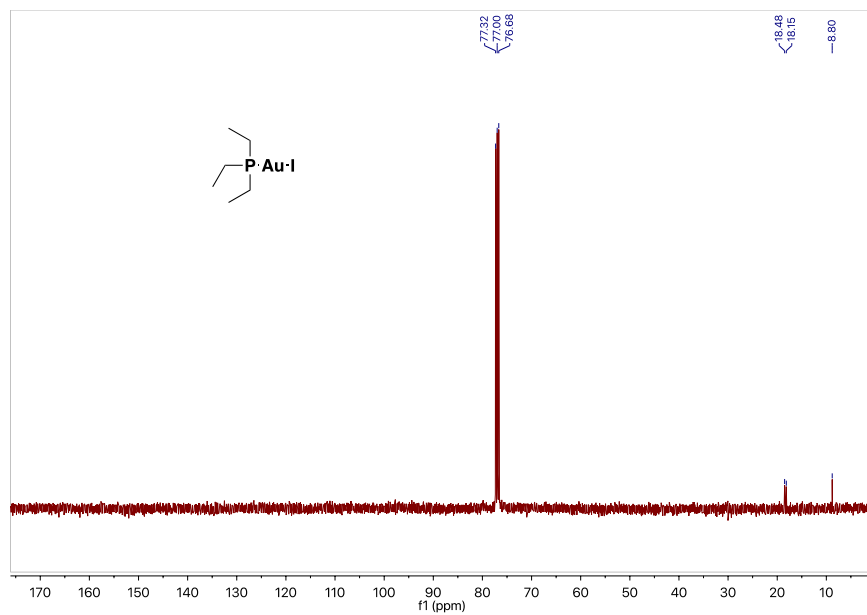

$^{31}\text{P}\{^1\text{H}\}$  NMR ( $\text{CDCl}_3$ , 243 MHz)

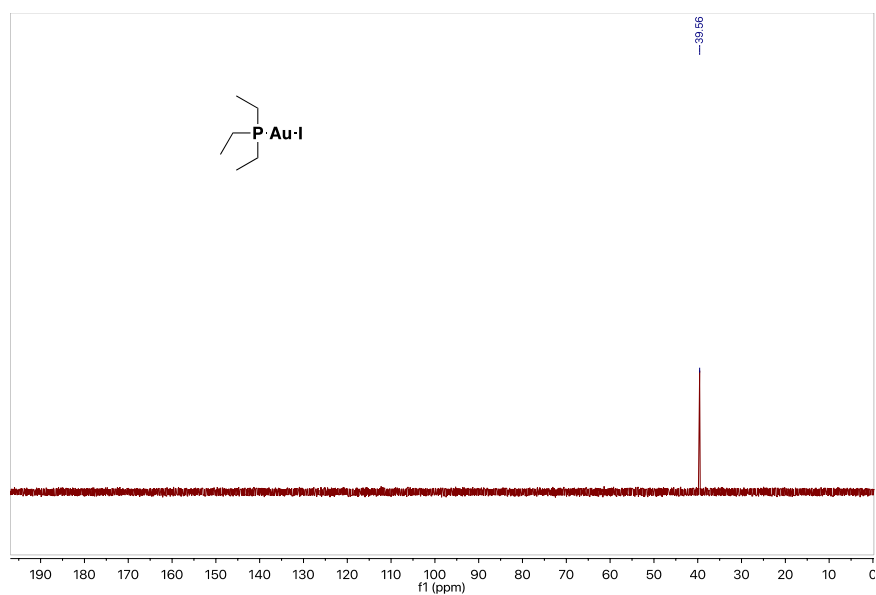

Purity of compounds was determined by absolute quantitative <sup>1</sup>H nuclear magnetic resonance (qHNMR) following the “general guidelines for quantitative <sup>1</sup>H NMR experiments” provided by the *Journal of Medicinal Chemistry*. Percentage Purity (*P* [%]) of sample was calculated according to the following equation:

$$P [\%] = \frac{n_{IC} \cdot Int_t \cdot MW_t \cdot m_{IC}}{n_t \cdot Int_{IC} \cdot MW_{IC} \cdot m_s} \cdot P_{IC}$$

Where:  $m_{IC}$  = mass of internal calibrant (IC)

$m_s$  = mass of sample

$Int_{IC}$  = integral of internal calibrant being used for quantification

$Int_t$  = integral of target analyte being used for quantification

$n_{IC}$  = number of protons that give rise to  $Int_{IC}$

$n_t$  = number of protons that give rise to  $Int_t$

$MW_{IC}$  = molecular weight of the internal calibrant

$MW_t$  = molecular weight of the target analyte

$P_{IC}$  = purity of the internal calibrant

The internal calibrant used for qHNMR experiments was 1,2-dichloroethane (Acros Organics), molecular weight ( $MW_{IC}$ ) = 98.96 g/mol. Purity of the internal standard ( $P_{IC}$ ) was 99.8 % according to the chemical specifications. Ten  $\mu$ L (density = 1.25 g/mL,  $m_{IC}$  = 12.5 mg) of internal calibrant was added to the qHNMR samples using a micropipette.

**qHNMR of (Tri-*n*-butylphosphine)gold(I) chloride (9)**  
(CDCl<sub>3</sub>, 600 MHz)

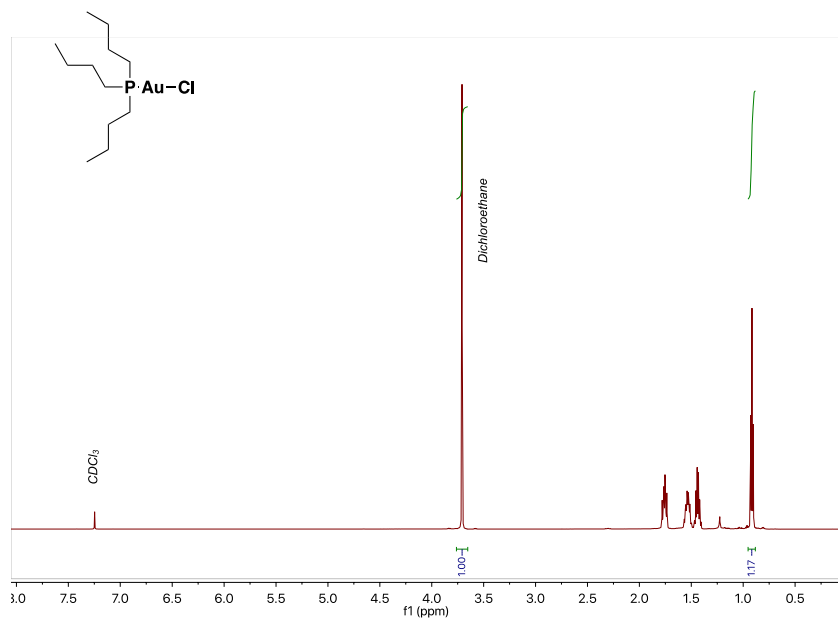

$$m_s = 29.6 \text{ mg}, m_{IC} = 12.5 \text{ mg}$$

$$P_{IC} = 99.8 \%$$

$$Int_t = 1.17, n_t = 9$$

$$Int_{IC} = 1, n_{IC} = 4$$

$$MW_t = 434.73 \text{ g/mol}$$

$$MW_{IC} = 98.96 \text{ g/mol}$$

$$P [\%] = 96.27 \%$$

**qHNMR of (Tri-*n*-propylphosphine)gold(I) chloride (11)**  
(CDCl<sub>3</sub>, 600 MHz)

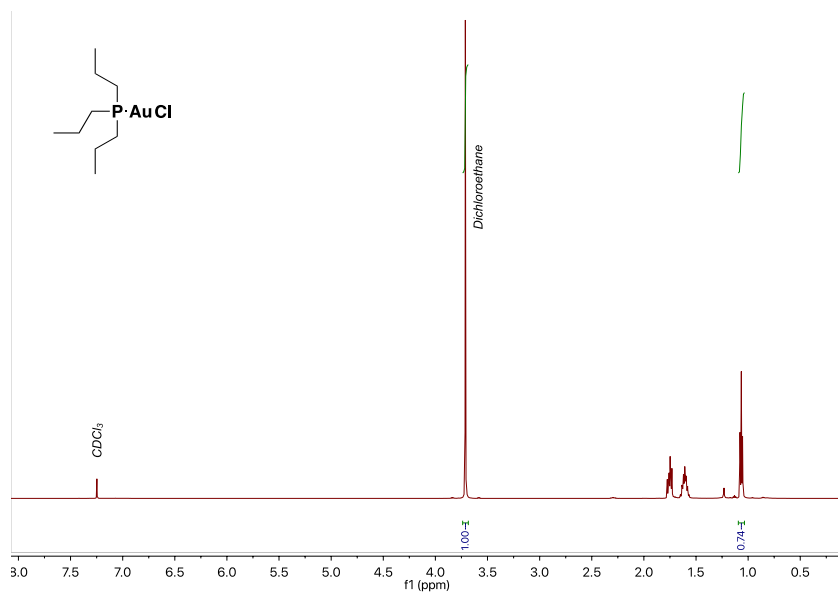

$$m_s = 16.4 \text{ mg}, m_{IC} = 12.5 \text{ mg}$$

$$P_{IC} = 99.8 \%$$

$$Int_t = 0.74, n_t = 9$$

$$Int_{IC} = 1, n_{IC} = 4$$

$$MW_t = 392.65 \text{ g/mol}$$

$$MW_{IC} = 98.96 \text{ g/mol}$$

$$P [\%] = 99.26 \%$$

**<sup>1</sup>H NMR of (Triisopropylphosphine)gold(I) chloride (12)**  
(CDCl<sub>3</sub>, 600 MHz)

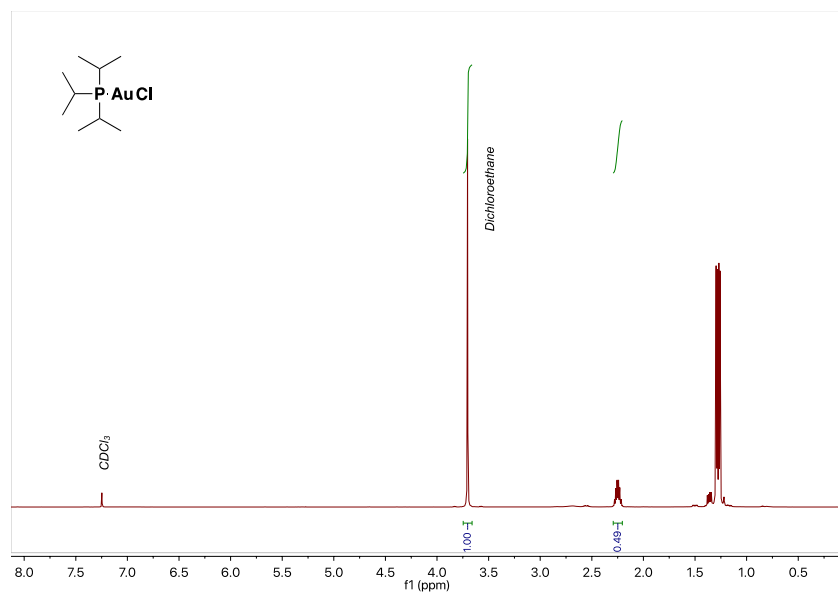

$$m_s = 33.6 \text{ mg}, m_{IC} = 12.5 \text{ mg}$$

$$P_{IC} = 99.8 \%$$

$$Int_t = 0.49, n_t = 3$$

$$Int_{IC} = 1, n_{IC} = 4$$

$$MW_t = 392.65 \text{ g/mol}$$

$$MW_{IC} = 98.96 \text{ g/mol}$$

$$P [\%] = 96.24 \%$$

**<sup>1</sup>H NMR of Bis(trimethylphosphine)gold(I) chloride (13)**  
(CDCl<sub>3</sub>, 600 MHz)

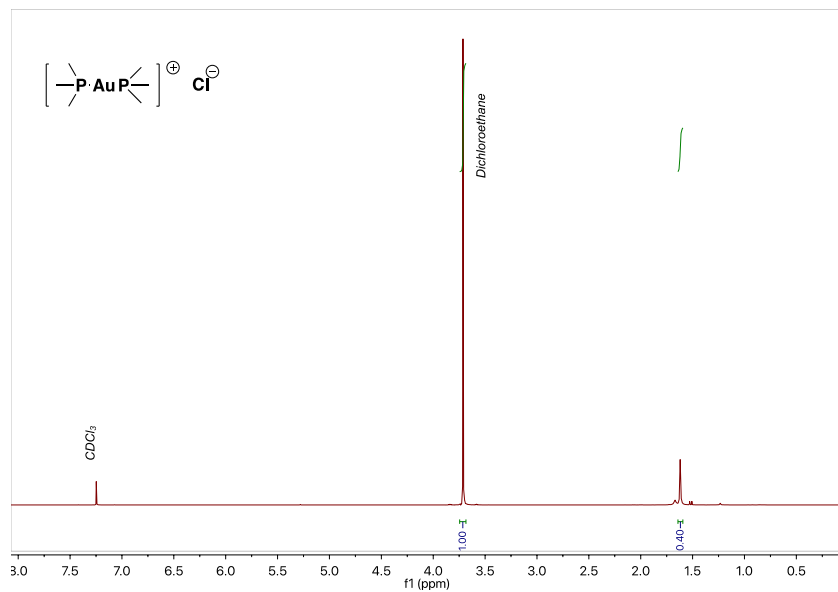

$$m_s = 4.5 \text{ mg}, m_{IC} = 12.5 \text{ mg}$$

$$P_{IC} = 99.8 \%$$

$$Int_t = 0.40, n_t = 18$$

$$Int_{IC} = 1, n_{IC} = 4$$

$$MW_t = 384.57 \text{ g/mol}$$

$$MW_{IC} = 98.96 \text{ g/mol}$$

$$P [\%] = 95.76 \%$$

**<sup>1</sup>H NMR of Bis(triethylphosphine)gold(I) chloride (14)**  
(CDCl<sub>3</sub>, 600 MHz)

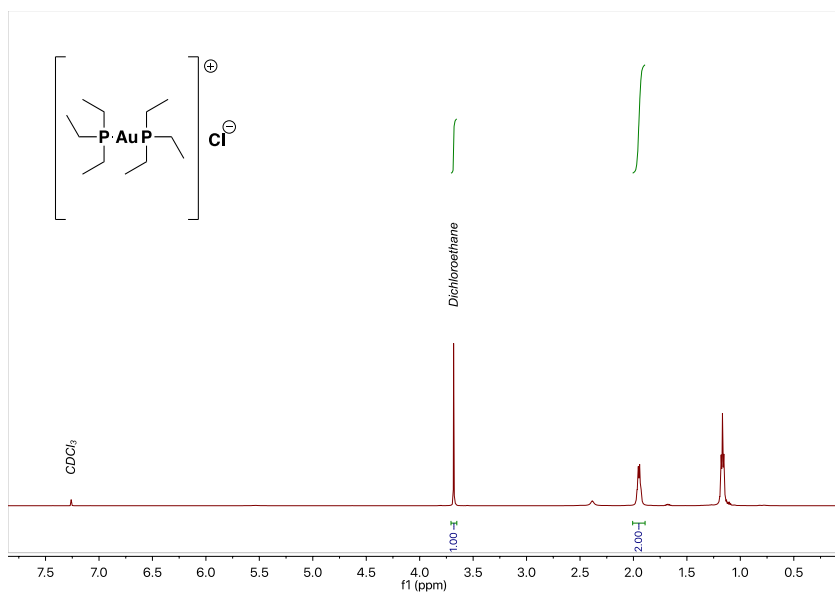

$m_s = 40.4 \text{ mg}$ ,  $m_{IC} = 12.5 \text{ mg}$

$P_{IC} = 99.8 \%$

$Int_t = 2$ ,  $n_t = 12$

$Int_{IC} = 1$ ,  $n_{IC} = 4$

$MW_t = 468.73 \text{ g/mol}$

$MW_{IC} = 98.96 \text{ g/mol}$

$P [\%] = 97.50 \%$

**<sup>1</sup>H NMR of Bis(triisopropylphosphine)gold(I) chloride (15)**  
(CDCl<sub>3</sub>, 600 MHz)

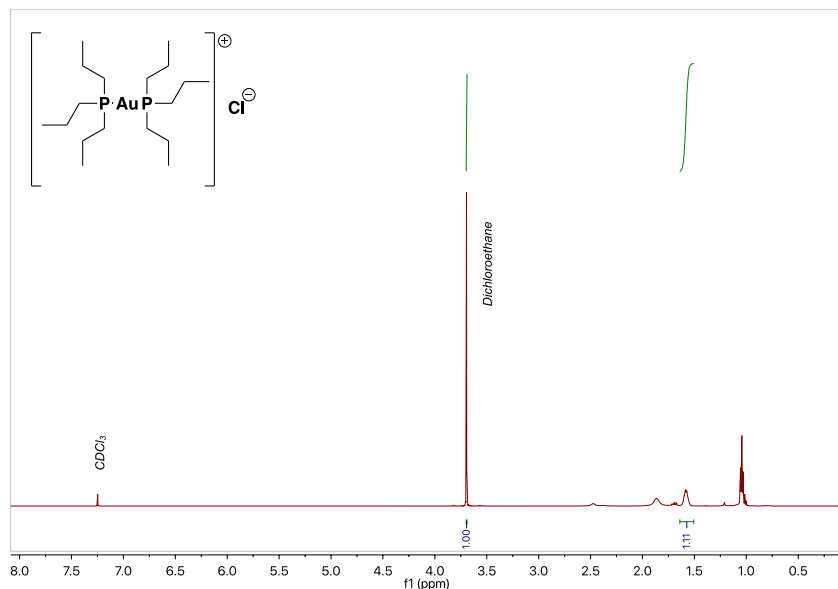

$m_s = 27.1 \text{ mg}$ ,  $m_{IC} = 12.5 \text{ mg}$ ,

$P_{IC} = 99.8 \%$

$Int_t = 1.11$ ,  $n_t = 12$

$Int_{IC} = 1$ ,  $n_{IC} = 4$

$MW_t = 552.89 \text{ g/mol}$

$MW_{IC} = 98.96 \text{ g/mol}$

$P [\%] = 95.15 \%$



**<sup>1</sup>H NMR of Bis(triisopropylphosphine)gold(I) chloride (16)**  
(CDCl<sub>3</sub>, 600 MHz)

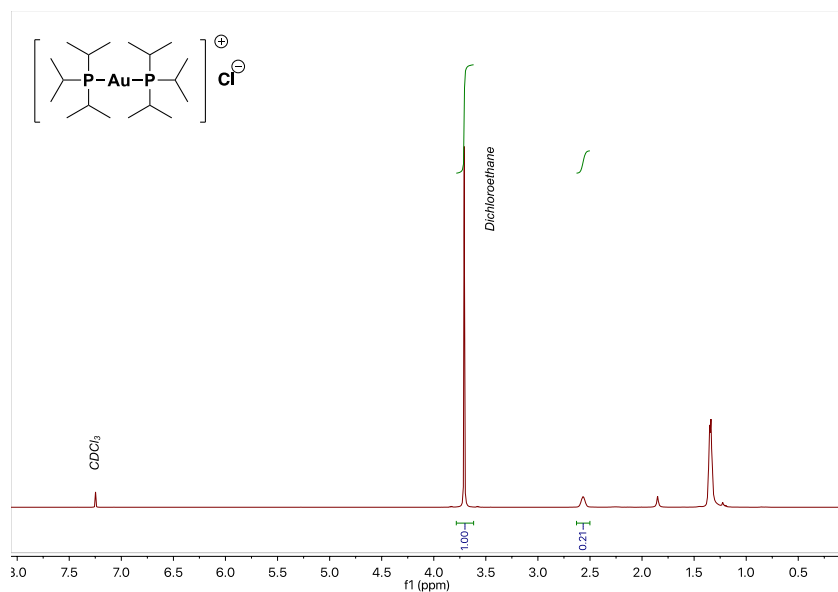

$$m_s = 10.1 \text{ mg}, m_{IC} = 12.5 \text{ mg}$$

$$P_{IC} = 99.8 \%$$

$$Int_t = 0.21, n_t = 6$$

$$Int_{IC} = 1, n_{IC} = 4$$

$$MW_t = 552.89 \text{ g/mol}$$

$$MW_{IC} = 98.96 \text{ g/mol}$$

$$P [\%] = 96.61 \%$$

**<sup>1</sup>H NMR of (Dimethylphenylphosphine)gold(I) chloride (18)**  
(CDCl<sub>3</sub>, 600 MHz)

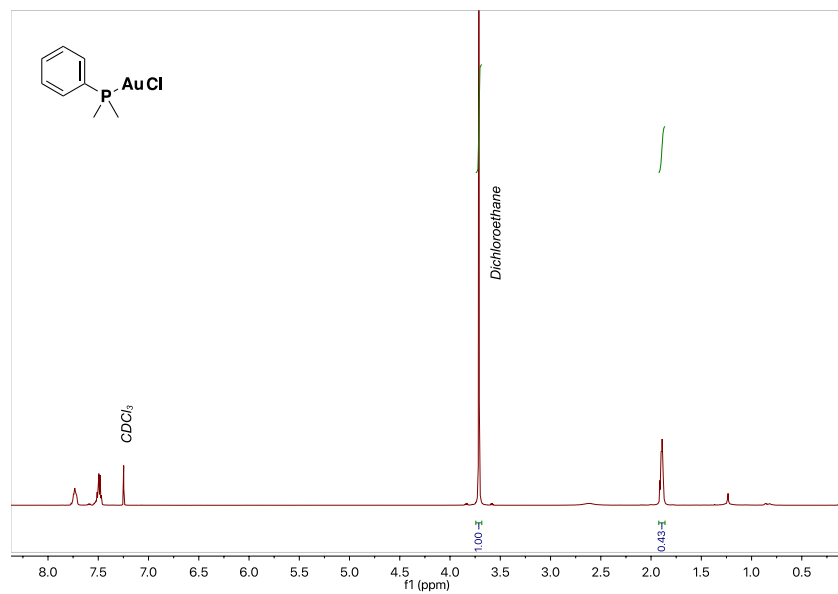

$$m_s = 13.8 \text{ mg}, m_{IC} = 12.5 \text{ mg}$$

$$P_{IC} = 99.8 \%$$

$$Int_t = 0.43, n_t = 6$$

$$Int_{IC} = 1, n_{IC} = 4$$

$$MW_t = 370.56 \text{ g/mol}$$

$$MW_{IC} = 98.96 \text{ g/mol}$$

$$P [\%] = 97.03 \%$$

### qHNMR of (Triethylphosphine)gold(I) bromide (24)

(CDCl<sub>3</sub>, 600 MHz)

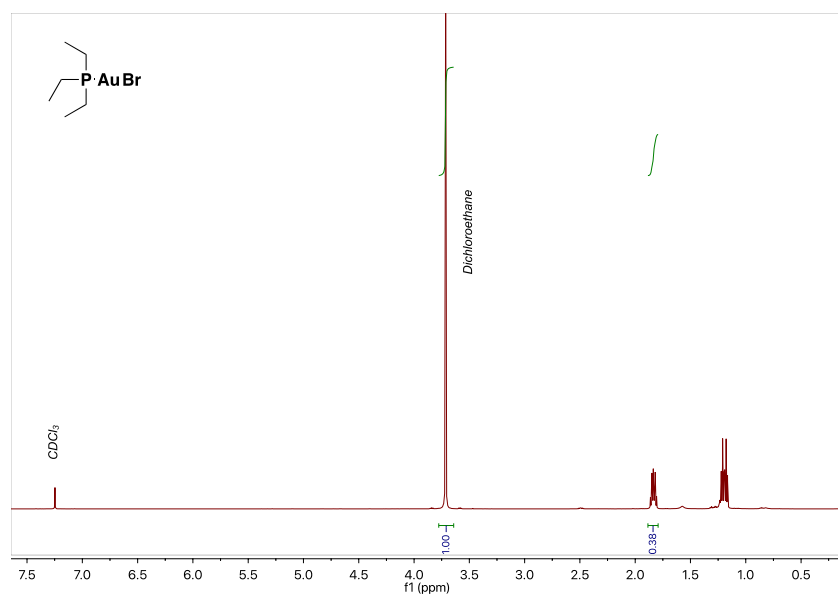

$$m_s = 12.8 \text{ mg}, m_{IC} = 12.5 \text{ mg}$$

$$P_{IC} = 99.8 \%$$

$$Int_t = 0.38, n_t = 6$$

$$Int_{IC} = 1, n_{IC} = 4$$

$$MW_t = 395.03 \text{ g/mol}$$

$$MW_{IC} = 98.96 \text{ g/mol}$$

$$P [\%] = 98.55 \%$$

### qHNMR of (Triethylphosphine)gold(I) iodide (26)

(CDCl<sub>3</sub>, 600 MHz)

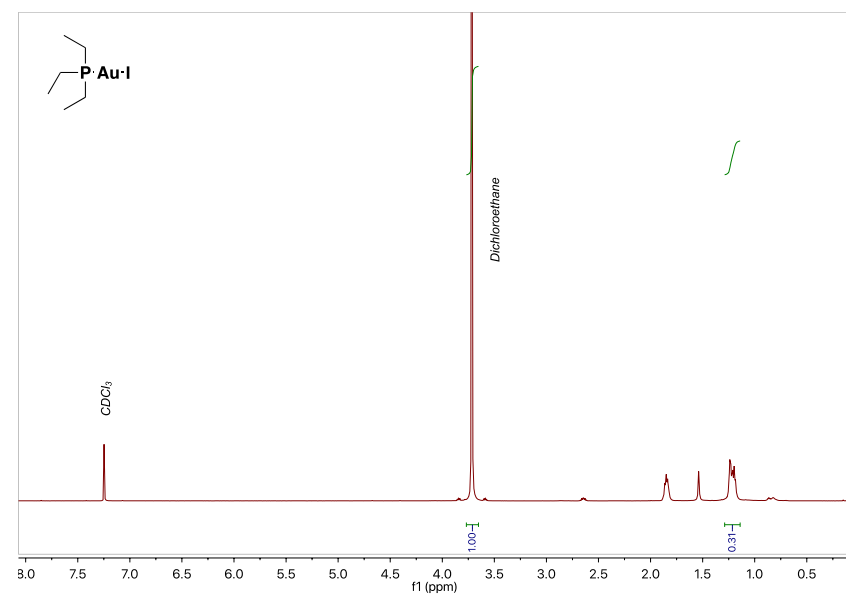

$$m_s = 7.9 \text{ mg}, m_{IC} = 12.5 \text{ mg}$$

$$P_{IC} = 99.8 \%$$

$$Int_t = 0.31, n_t = 9$$

$$Int_{IC} = 1, n_{IC} = 4$$

$$MW_t = 442.03 \text{ g/mol}$$

$$MW_{IC} = 98.96 \text{ g/mol}$$

$$P [\%] = 97.18 \%$$
